# Supplementary material for: Breaking the circuit: Reduced cerebello-thalamo-cortical functional connectivity during traumatic memory retrieval in PTSD and its dissociative subtype
Source: Research Square preprint supplement (doi:10.21203/rs.3.rs-6008376/v1), 2025-03-12
Supplement: Supplementary file 1 [file 4cc4edf1e196d7c64b946d1f.docx]

**Supplementary Table 1:** ROI-to-ROI connectivity differences for the two-sided contrasts. A) PTSD>Controls; and B) PTSD+DS > Controls. No significant results were found for the PTSD>PTSD+DS contrast. Results were corrected for multiple comparisons at the cluster level; those results surviving FDR-correction (pFDR>0.05) at the cluster level are shown.

| Clusters | Connections | Statistic | Effect sizes | p-unc | p-FDR |
| --- | --- | --- | --- | --- | --- |
| **PTSD > Controls** | | | | | |
| **Neutral Memory Retrieval:** | | | | | |
| n.s. | | | | | |
| **Traumatic Memory Retrieval:** | | | | | |
| Cluster 1/31 | | F(3,78) = 8.90 | | η² = 0.26 | | --- | | 0.000038 | 0.003881 |
|  | sLOC l (Lateral Occipital Cortex, superior division Left) - AG l (Angular Gyrus Left) | T(80) = 4.33 | dz = 0.48 | 0.000043 | 0.006321 |
|  | Precuneous (Precuneous Cortex) - AG l (Angular Gyrus Left) | T(80) = 3.70 | dz = 0.41 | 0.000390 | 0.018992 |
|  | sLOC l (Lateral Occipital Cortex, superior division Left) - AG r (Angular Gyrus Right) | T(80) = 3.45 | dz = 0.38 | 0.000910 | 0.066416 |
|  | Precuneous (Precuneous Cortex) - AG r (Angular Gyrus Right) | T(80) = 3.02 | dz = 0.34 | 0.003429 | 0.071514 |
|  | sLOC r (Lateral Occipital Cortex, superior division Right) - AG r (Angular Gyrus Right) | T(80) = 3.40 | dz = 0.38 | 0.001055 | 0.077009 |
|  | sLOC r (Lateral Occipital Cortex, superior division Right) - AG l (Angular Gyrus Left) | T(80) = 2.85 | dz = 0.32 | 0.005512 | 0.201186 |
| Cluster 2/31 | | F(3,78) = 8.73 | η² = 0.25 | 0.000046 | 0.003881 |
|  | aSMG l (Supramarginal Gyrus, anterior division Left)- PaCiG r (Paracingulate Gyrus Right) | T(80) = 3.64 | dz = 0.4 | 0.000475 | 0.023112 |
|  | aSMG l (Supramarginal Gyrus, anterior division Left)- PaCiG l (Paracingulate Gyrus Left) | T(80) = 3.02 | dz = 0.34 | 0.003349 | 0.061126 |
|  | pSMG l (Supramarginal Gyrus, posterior division Left)- FP l (Frontal Pole Left) | T(80) = -2.93 | dz =-0.33 | 0.004390 | 0.080120 |
|  | aSMG r (Supramarginal Gyrus, anterior division Right)- PaCiG r (Paracingulate Gyrus Right) | T(80) = 2.53 | dz = 0.28 | 0.013225 | 0.128719 |
|  | SPL r (Superior Parietal Lobule Right) - FP r (Frontal Pole Right) | T(80) = -2.09 | dz =-0.23 | 0.040035 | 0.224811 |
|  | SPL l (Superior Parietal Lobule Left) - FP l (Frontal Pole Left) | T(80) = -2.14 | dz =-0.24 | 0.035567 | 0.259639 |
| Cluster 3/31 | | F(3,78) = 8.56 | | η² = 0.25 | | --- | |  | | 0.000055 | 0.003881 |
|  | Cereb2 r (Cerebellum Crus2 Right)- Cereb1 r (Cerebellum Crus1 Right) | T(80) = 4.47 | dz = 0.5 | 0.000026 | 0.002590 |
|  | Cereb1 l (Cerebellum Crus1 Left) - Cereb2 l (Cerebellum Crus2 Left) | T(80) = 4.30 | dz = 0.48 | 0.000048 | 0.006998 |
|  | Cereb2 r (Cerebellum Crus2 Right) - Cereb1 l (Cerebellum Crus1 Left) | T(80) = 3.78 | dz = 0.42 | 0.000301 | 0.009077 |
|  | Cereb1 r (Cerebellum Crus1 Right) - Cereb2 l (Cerebellum Crus2 Left) | T(80) = 3.54 | dz = 0.39 | 0.000665 | 0.015908 |
|  | Cereb1 r (Cerebellum Crus1 Right) - Cereb1 l (Cerebellum Crus1 Left) | T(80) = 3.50 | dz = 0.39 | 0.000763 | 0.015908 |
|  | Cereb2 r (Cerebellum Crus2 Right) - Cereb2 l (Cerebellum Crus2 Left) | T(80) = 2.71 | dz = 0.3 | 0.008216 | 0.066206 |
| Cluster 4/31 | | F(3,78) = 7.82 | | η² = 0.23 | | --- | |  | | 0.000125 | 0.006537 |
|  | SPL l (Superior Parietal Lobule Left) - SFG r (Superior Frontal Gyrus Right) | T(80) = 4.45 | dz = 0.49 | 0.000027 | 0.001973 |
|  | SPL r (Superior Parietal Lobule Right) - SFG l (Superior Frontal Gyrus Left) | T(80) = 3.80 | dz = 0.42 | 0.000280 | 0.013642 |
|  | aSMG l (Supramarginal Gyrus, anterior division Left)- SFG r (Superior Frontal Gyrus Right) | T(80) = 3.66 | dz = 0.41 | 0.000444 | 0.023112 |
|  | SPL r (Superior Parietal Lobule Right) - SFG r (Superior Frontal Gyrus Right) | T(80) = 3.31 | dz = 0.37 | 0.001420 | 0.034565 |
|  | aSMG r (Supramarginal Gyrus, anterior division Right) - SFG r (Superior Frontal Gyrus Right) | T(80) = 2.99 | dz = 0.33 | 0.003662 | 0.066840 |
|  | aSMG l (Supramarginal Gyrus, anterior division Left) - MidFG r (Middle Frontal Gyrus Right) | T(80) = 2.58 | dz = 0.29 | 0.011575 | 0.109900 |
|  | aSMG l (Supramarginal Gyrus, anterior division Left) - SFG l (Superior Frontal Gyrus Left) | T(80) = 2.54 | dz = 0.28 | 0.012922 | 0.109900 |
|  | aSMG r (Supramarginal Gyrus, anterior division Right) - MidFG l (Middle Frontal Gyrus Left) | T(80) = 2.70 | dz = 0.3 | 0.008558 | 0.113590 |
|  | SPL r (Superior Parietal Lobule Right) - MidFG l (Middle Frontal Gyrus Left) | T(80) = 2.49 | dz = 0.28 | 0.015002 | 0.121682 |
|  | aSMG r (Supramarginal Gyrus, anterior division Right) - MidFG r (Middle Frontal Gyrus Right) | T(80) = 2.47 | dz = 0.27 | 0.015732 | 0.139802 |
|  | aSMG r (Supramarginal Gyrus, anterior division Right) - SFG l (Superior Frontal Gyrus Left) | T(80) = 2.45 | dz = 0.27 | 0.016278 | 0.139802 |
|  | aSMG l (Supramarginal Gyrus, anterior division Left) - MidFG l (Middle Frontal Gyrus Left) | T(80) = 2.23 | dz = 0.25 | 0.028266 | 0.157366 |
|  | SPL l (Superior Parietal Lobule Left) - SFG l (Superior Frontal Gyrus Left) | T(80) = 2.35 | dz = 0.26 | 0.021110 | 0.162211 |
| Cluster 5/31 | | F(3,78) = 6.96 | | η² = 0.21 | | --- | |  | | 0.000328 | 0.013000 |
|  | toMTG r (Middle Temporal Gyrus, temporooccipital part Right) - pMTG r (Middle Temporal Gyrus, posterior division Right) | T(80) = 4.38 | dz = 0.49 | 0.000035 | 0.005088 |
|  | toMTG r (Middle Temporal Gyrus, temporooccipital part Right)- pMTG l (Middle Temporal Gyrus, posterior division Left) | T(80) = 4.20 | dz = 0.47 | 0.000070 | 0.005088 |
|  | toITG r (Inferior Temporal Gyrus, temporooccipital part Right) - pMTG r (Middle Temporal Gyrus, posterior division Right) | T(80) = 4.17 | dz = 0.46 | 0.000077 | 0.011210 |
|  | toITG l (Inferior Temporal Gyrus, temporooccipital part Left) - pMTG r (Middle Temporal Gyrus, posterior division Right) | T(80) = 4.13 | dz = 0.46 | 0.000087 | 0.012772 |
|  | toITG r (Inferior Temporal Gyrus, temporooccipital part Right) - pMTG l (Middle Temporal Gyrus, posterior division Left) | T(80) = 3.84 | dz = 0.43 | 0.000246 | 0.017957 |
|  | toITG l (Inferior Temporal Gyrus, temporooccipital part Left) - pMTG l (Middle Temporal Gyrus, posterior division Left) | T(80) = 3.45 | dz = 0.38 | 0.000909 | 0.066348 |
|  | toITG l (Inferior Temporal Gyrus, temporooccipital part Left) - TP l (Temporal Pole Left) | T(80) = 2.70 | dz = 0.3 | 0.008562 | 0.138918 |
|  | toITG l (Inferior Temporal Gyrus, temporooccipital part Left) - MedFC (Frontal Medial Cortex) | T(80) = 2.10 | dz = 0.23 | 0.038453 | 0.267339 |
| Cluster 6/31 | | F(3,78) = 6.83 | | η² = 0.21 | | --- | | 0.000380 | 0.013000 |
|  | AC (Cingulate Gyrus, anterior division)- Cereb6 r (Cerebellum VI Right) | T(80) = -3.77 | dz =-0.42 | 0.000308 | 0.024824 |
|  | AC (Cingulate Gyrus, anterior division) - Cereb6 l (Cerebellum VI Left) | T(80) = -2.95 | dz =-0.33 | 0.004201 | 0.087631 |
|  | AC (Cingulate Gyrus, anterior division) - Ver6 (Vermis VI) | T(80) = -2.75 | dz =-0.31 | 0.007398 | 0.096518 |
|  | AC (Cingulate Gyrus, anterior division) - TOFusC l (Temporal Occipital Fusiform Cortex Left) | T(80) = -2.31 | dz =-0.26 | 0.023260 | 0.152550 |
|  | IFG oper r (Inferior Frontal Gyrus, pars opercularis Right) - Ver6 (Vermis VI) | T(80) = -2.60 | dz =-0.29 | 0.011041 | 0.179111 |
|  | AC (Cingulate Gyrus, anterior division) - Ver7 (Vermis VII) | T(80) = -2.04 | dz =-0.23 | 0.044350 | 0.210133 |
|  | IFG tri l (Inferior Frontal Gyrus, pars triangularis Left) - TOFusC r (Temporal Occipital Fusiform Cortex Right) | T(80) = 2.68 | dz = 0.3 | 0.008853 | 0.267073 |
|  | IFG tri l (Inferior Frontal Gyrus, pars triangularis Left) - Ver6 (Vermis VI) | T(80) = -2.10 | dz =-0.23 | 0.038471 | 0.295618 |
| Cluster 7/31 | | F(2,79) = 8.56 | | η² = 0.18 | | --- | | 0.000433 | 0.013000 |
|  | SFG r (Superior Frontal Gyrus Right) - MidFG r (Middle Frontal Gyrus Right) | T(80) = 3.97 | dz = 0.44 | 0.000157 | 0.004741 |
|  | MidFG l (Middle Frontal Gyrus Left) - SFG r (Superior Frontal Gyrus Right) | T(80) = 3.96 | dz = 0.44 | 0.000162 | 0.011852 |
|  | SFG l (Superior Frontal Gyrus Left) - MidFG r (Middle Frontal Gyrus Right) | T(80) = 4.09 | dz = 0.45 | 0.000103 | 0.014982 |
|  | SFG l (Superior Frontal Gyrus Left) - SFG r (Superior Frontal Gyrus Right) | T(80) = 3.45 | dz = 0.38 | 0.000898 | 0.043725 |
|  | MidFG l (Middle Frontal Gyrus Left) - MidFG r (Middle Frontal Gyrus Right) | T(80) = 2.65 | dz = 0.29 | 0.009756 | 0.129492 |
|  | MidFG l (Middle Frontal Gyrus Left) - SFG l (Superior Frontal Gyrus Left) | T(80) = 2.34 | dz = 0.26 | 0.021800 | 0.198918 |
| Cluster 8/31 | | F(3,78) = 6.40 | | η² = 0.2 | | --- | | 0.000618 | 0.014628 |
|  | pSMG r (Supramarginal Gyrus, posterior division Right) - PostCG r (Postcentral Gyrus Right) | T(80) = 4.88 | dz = 0.54 | 0.000005 | 0.000786 |
|  | SPL l (Superior Parietal Lobule Left) - PostCG l (Postcentral Gyrus Left) | T(80) = 3.90 | dz = 0.43 | 0.000199 | 0.009687 |
|  | SPL l (Superior Parietal Lobule Left) - PreCG l (Precentral Gyrus Left) | T(80) = 3.76 | dz = 0.42 | 0.000321 | 0.010362 |
|  | SPL r (Superior Parietal Lobule Right) - SMA r (Juxtapositional Lobule Cortex -formerly Supplementary Motor Cortex- Right) | T(80) = 4.01 | dz = 0.45 | 0.000137 | 0.013642 |
|  | SPL r (Superior Parietal Lobule Right) - SMA L(Juxtapositional Lobule Cortex -formerly Supplementary Motor Cortex- Left) | T(80) = 3.87 | dz = 0.43 | 0.000221 | 0.013642 |
|  | SPL l (Superior Parietal Lobule Left) - SMA r (Juxtapositional Lobule Cortex -formerly Supplementary Motor Cortex- Right) | T(80) = 3.59 | dz = 0.4 | 0.000565 | 0.013748 |
|  | SPL r (Superior Parietal Lobule Right) - PreCG l (Precentral Gyrus Left) | T(80) = 3.66 | dz = 0.41 | 0.000457 | 0.016668 |
|  | pSMG l (Supramarginal Gyrus, posterior division Left) - PostCG l (Postcentral Gyrus Left) | T(80) = 3.34 | dz = 0.37 | 0.001282 | 0.031199 |
|  | aSMG r (Supramarginal Gyrus, anterior division Right) - PreCG r (Precentral Gyrus Right) | T(80) = 3.12 | dz = 0.35 | 0.002545 | 0.064017 |
|  | aSMG r (Supramarginal Gyrus, anterior division Right) - PostCG r (Postcentral Gyrus Right) | T(80) = 3.11 | dz = 0.35 | 0.002631 | 0.064017 |
|  | SPL r (Superior Parietal Lobule Right) - PostCG r (Postcentral Gyrus Right) | T(80) = 2.89 | dz = 0.32 | 0.004957 | 0.083803 |
|  | SPL l (Superior Parietal Lobule Left) - PreCG r (Precentral Gyrus Right) | T(80) = 2.88 | dz = 0.32 | 0.005109 | 0.093247 |
|  | SPL r (Superior Parietal Lobule Right) - PreCG r (Precentral Gyrus Right) | T(80) = 2.71 | dz = 0.3 | 0.008338 | 0.104803 |
|  | aSMG l (Supramarginal Gyrus, anterior division Left)-atlas.PostCG r (Postcentral Gyrus Right) | T(80) = 2.52 | dz = 0.28 | 0.013685 | 0.109900 |
|  | aSMG l (Supramarginal Gyrus, anterior division Left) - PreCG l (Precentral Gyrus Left) | T(80) = 2.51 | dz = 0.28 | 0.014027 | 0.109900 |
|  | SPL l (Superior Parietal Lobule Left) - SMA L(Juxtapositional Lobule Cortex -formerly Supplementary Motor Cortex- Left) | T(80) = 2.65 | dz = 0.29 | 0.009592 | 0.116708 |
|  | aSMG r (Supramarginal Gyrus, anterior division Right) - PreCG l (Precentral Gyrus Left) | T(80) = 2.60 | dz = 0.29 | 0.011078 | 0.118005 |
|  | aSMG r (Supramarginal Gyrus, anterior division Right) - SMA L(Juxtapositional Lobule Cortex -formerly Supplementary Motor Cortex- Left) | T(80) = 2.60 | dz = 0.29 | 0.011243 | 0.118005 |
|  | pSMG r (Supramarginal Gyrus, posterior division Right) - PreCG r (Precentral Gyrus Right) | T(80) = 3.12 | dz = 0.35 | 0.002529 | 0.123077 |
|  | SPL l (Superior Parietal Lobule Left) - PostCG r (Postcentral Gyrus Right) | T(80) = 2.45 | dz = 0.27 | 0.016291 | 0.139908 |
|  | pSMG l (Supramarginal Gyrus, posterior division Left) - PreCG l (Precentral Gyrus Left) | T(80) = 2.45 | dz = 0.27 | 0.016371 | 0.140597 |
|  | aSMG l (Supramarginal Gyrus, anterior division Left) - PreCG r (Precentral Gyrus Right) | T(80) = 2.25 | dz = 0.25 | 0.027284 | 0.157366 |
|  | SPL r (Superior Parietal Lobule Right) - PostCG l (Postcentral Gyrus Left) | T(80) = 2.34 | dz = 0.26 | 0.021602 | 0.163555 |
|  | pSMG l (Supramarginal Gyrus, posterior division Left) - PostCG r (Postcentral Gyrus Right) | T(80) = 2.31 | dz = 0.26 | 0.023261 | 0.178745 |
|  | aSMG l (Supramarginal Gyrus, anterior division Left) - PostCG l (Postcentral Gyrus Left) | T(80) = 2.10 | dz = 0.23 | 0.038614 | 0.187922 |
|  | pSMG r (Supramarginal Gyrus, posterior division Right) - PostCG l (Postcentral Gyrus Left) | T(80) = 2.37 | dz = 0.26 | 0.020428 | 0.331383 |
|  | pSMG r (Supramarginal Gyrus, posterior division Right) - PreCG l (Precentral Gyrus Left) | T(80) = 2.25 | dz = 0.25 | 0.026945 | 0.356643 |
| Cluster 9/31 | | F(3,78) = 6.39 | | η² = 0.2 | | --- | |  | | 0.000629 | 0.014628 |
|  | MidFG l (Middle Frontal Gyrus Left)-atlas.Cereb2 r (Cerebelum Crus2 Right) | T(80) = -4.38 | dz =-0.49 | 0.000035 | 0.005180 |
|  | MidFG r (Middle Frontal Gyrus Right) - Cereb2 l (Cerebellum Crus2 Left) | T(80) = -3.51 | dz =-0.39 | 0.000740 | 0.021597 |
|  | MidFG r (Middle Frontal Gyrus Right) - Cereb2 r (Cerebellum Crus2 Right) | T(80) = -3.22 | dz =-0.36 | 0.001836 | 0.033506 |
|  | SFG l (Superior Frontal Gyrus Left) - Cereb2 r (Cerebellum Crus2 Right) | T(80) = -3.28 | dz =-0.36 | 0.001530 | 0.054890 |
|  | SFG l (Superior Frontal Gyrus Left) - Cereb2 l (Cerebellum Crus2 Left) | T(80) = -2.96 | dz =-0.33 | 0.004019 | 0.065194 |
|  | SFG r (Superior Frontal Gyrus Right) - Cereb2 l (Cerebellum Crus2 Left) | T(80) = -2.48 | dz =-0.28 | 0.015091 | 0.110163 |
|  | MidFG l (Middle Frontal Gyrus Left) - Cereb1 r (Cerebelum Crus1 Right) | T(80) = -2.65 | dz =-0.29 | 0.009597 | 0.129492 |
|  | MidFG l (Middle Frontal Gyrus Left) - Cereb2 l (Cerebellum Crus2 Left) | T(80) = -2.56 | dz =-0.28 | 0.012382 | 0.150643 |
|  | SFG l (Superior Frontal Gyrus Left) - Cereb1 r (Cerebellum Crus1 Right) | T(80) = -2.16 | dz =-0.24 | 0.034067 | 0.196586 |
|  | MidFG l (Middle Frontal Gyrus Left) - Cereb1 l (Cerebellum Crus1 Left) | T(80) = -2.32 | dz =-0.26 | 0.023162 | 0.198918 |
|  | SFG l (Superior Frontal Gyrus Left) - Cereb1 l (Cerebellum Crus1 Left) | T(80) = -2.01 | dz =-0.22 | 0.047594 | 0.231622 |
| Cluster 10/31 | | F(3,78) = 6.22 | | η² = 0.19 | | --- | | 0.000760 | 0.014628 |
|  | PaCiG r (Paracingulate Gyrus Right) - Cereb2 r (Cerebellum Crus2 Right) | T(80) = -3.72 | dz =-0.41 | 0.000373 | 0.023112 |
|  | PaCiG r (Paracingulate Gyrus Right) - Cereb2 l (Cerebellum Crus2 Left) | T(80) = -3.54 | dz =-0.39 | 0.000667 | 0.024345 |
|  | PaCiG r (Paracingulate Gyrus Right) - Cereb1 r (Cerebellum Crus1 Right) | T(80) = -3.25 | dz =-0.36 | 0.001687 | 0.030793 |
|  | FP l (Frontal Pole Left) - Cereb2 r (Cerebellum Crus2 Right) | T(80) = -3.77 | dz =-0.42 | 0.000313 | 0.045749 |
|  | PaCiG l (Paracingulate Gyrus Left) - Cereb2 r (Cerebellum Crus2 Right) | T(80) = -3.40 | dz =-0.38 | 0.001059 | 0.051555 |
|  | PaCiG l (Paracingulate Gyrus Left) - Cereb1 l (Cerebellum Crus1 Left) | T(80) = -2.84 | dz =-0.32 | 0.005770 | 0.093534 |
|  | PaCiG l (Paracingulate Gyrus Left) - Cereb2 l (Cerebellum Crus2 Left) | T(80) = -2.73 | dz = -0.3 | 0.007688 | 0.093534 |
|  | PaCiG l (Paracingulate Gyrus Left) - Cereb1 r (Cerebellum Crus1 Right) | T(80) = -2.51 | dz =-0.28 | 0.014016 | 0.107700 |
|  | PaCiG r (Paracingulate Gyrus Right) - Cereb1 l (Cerebellum Crus1 Left) | T(80) = -2.40 | dz =-0.27 | 0.018901 | 0.119979 |
|  | FP l (Frontal Pole Left) - Cereb1 r (Cerebellum Crus1 Right) | T(80) = -2.83 | dz =-0.31 | 0.005845 | 0.142220 |
|  | FP r (Frontal Pole Right) - Cereb2 l (Cerebellum Crus2 Left) | T(80) = -2.94 | dz =-0.33 | 0.004340 | 0.220677 |
|  | FP l (Frontal Pole Left) - Cereb2 l (Cerebellum Crus2 Left) | T(80) = -2.20 | dz =-0.24 | 0.030536 | 0.377363 |
|  | FP r (Frontal Pole Right) - Cereb2 r (Cerebellum Crus2 Right) | T(80) = -2.51 | dz =-0.28 | 0.014047 | 0.410160 |
| Cluster 11/31 | | F(3,78) = 6.12 | | η² = 0.19 | | --- | | 0.000857 | 0.014628 |
|  | MidFG l (Middle Frontal Gyrus Left) - PaCiG l (Paracingulate Gyrus Left) | T(80) = 3.28 | dz = 0.36 | 0.001549 | 0.046357 |
|  | MidFG l (Middle Frontal Gyrus Left) - PaCiG r (Paracingulate Gyrus Right) | T(80) = 3.27 | dz = 0.36 | 0.001588 | 0.046357 |
|  | MidFG r (Middle Frontal Gyrus Right) - PaCiG l (Paracingulate Gyrus Left) | T(80) = 2.96 | dz = 0.33 | 0.004074 | 0.057276 |
|  | MidFG r (Middle Frontal Gyrus Right) - PaCiG r (Paracingulate Gyrus Right) | T(80) = 2.84 | dz = 0.32 | 0.005757 | 0.064658 |
|  | SFG l (Superior Frontal Gyrus Left) - FP l (Frontal Pole Left) | T(80) = -2.11 | dz =-0.23 | 0.037793 | 0.204364 |
| Cluster 12/31 | | F(3,78) = 6.08 | | η² = 0.19 | | --- | | 0.000895 | 0.014628 |
|  | AG r (Angular Gyrus Right) - PostCG l (Postcentral Gyrus Left) | T(80) = 4.22 | dz = 0.47 | 0.000063 | 0.004635 |
|  | AG r (Angular Gyrus Right)- PreCG l (Precentral Gyrus Left) | T(80) = 3.56 | dz = 0.4 | 0.000629 | 0.016604 |
|  | AG r (Angular Gyrus Right) - PostCG r (Postcentral Gyrus Right) | T(80) = 3.47 | dz = 0.39 | 0.000850 | 0.016604 |
|  | AG r (Angular Gyrus Right)-atlas.PreCG r (Precentral Gyrus Right) | T(80) = 2.83 | dz = 0.31 | 0.005867 | 0.057108 |
|  | AG r (Angular Gyrus Right) - SMA L(Juxtapositional Lobule Cortex -formerly Supplementary Motor Cortex- Left) | T(80) = 2.55 | dz = 0.28 | 0.012692 | 0.106179 |
|  | AG l (Angular Gyrus Left) - PostCG l (Postcentral Gyrus Left) | T(80) = 2.83 | dz = 0.31 | 0.005915 | 0.143922 |
|  | PC (Cingulate Gyrus, posterior division) - PostCG r (Postcentral Gyrus Right) | T(80) = 2.99 | dz = 0.33 | 0.003750 | 0.170943 |
|  | PC (Cingulate Gyrus, posterior division) - PostCG l (Postcentral Gyrus Left) | T(80) = 2.54 | dz = 0.28 | 0.012879 | 0.170943 |
|  | PC (Cingulate Gyrus, posterior division) - PreCG l (Precentral Gyrus Left) | T(80) = 2.23 | dz = 0.25 | 0.028314 | 0.232042 |
|  | PC (Cingulate Gyrus, posterior division) - SMA L(Juxtapositional Lobule Cortex -formerly Supplementary Motor Cortex- Left) | T(80) = 2.23 | dz = 0.25 | 0.028608 | 0.232042 |
| Cluster 13/31 | | F(3,78) = 6.07 | | η² = 0.19 | | --- | | 0.000906 | 0.014628 |
|  | pSMG l (Supramarginal Gyrus, posterior division Left)-atlas.PT l (Planum Temporale Left) | T(80) = 3.87 | dz = 0.43 | 0.000222 | 0.016863 |
|  | pSMG l (Supramarginal Gyrus, posterior division Left) - PO l (Parietal Operculum Cortex Left) | T(80) = 3.86 | dz = 0.43 | 0.000231 | 0.016863 |
|  | aSMG r (Supramarginal Gyrus, anterior division Right) - PT r (Planum Temporale Right) | T(80) = 3.16 | dz = 0.35 | 0.002239 | 0.064017 |
|  | aSMG l (Supramarginal Gyrus, anterior division Left)- HG l (Heschl's Gyrus Left) | T(80) = 2.74 | dz = 0.3 | 0.007521 | 0.099819 |
|  | aSMG l (Supramarginal Gyrus, anterior division Left) - PT l (Planum Temporale Left) | T(80) = 2.62 | dz = 0.29 | 0.010426 | 0.109900 |
|  | pSMG l (Supramarginal Gyrus, posterior division Left) - PT r (Planum Temporale Right) | T(80) = 2.54 | dz = 0.28 | 0.013019 | 0.126701 |
|  | pSMG r (Supramarginal Gyrus, posterior division Right) - PO r (Parietal Operculum Cortex Right) | T(80) = 2.97 | dz = 0.33 | 0.003888 | 0.141908 |
|  | aSMG l (Supramarginal Gyrus, anterior division Left) - PO l (Parietal Operculum Cortex Left) | T(80) = 2.22 | dz = 0.25 | 0.029141 | 0.157366 |
|  | pSMG r (Supramarginal Gyrus, posterior division Right) - PT r (Planum Temporale Right) | T(80) = 2.68 | dz = 0.3 | 0.008992 | 0.187555 |
|  | pSMG l (Supramarginal Gyrus, posterior division Left) - CO l (Central Opercular Cortex Left) | T(80) = 2.21 | dz = 0.25 | 0.030323 | 0.220334 |
|  | pSMG l (Supramarginal Gyrus, posterior division Left) - CO r (Central Opercular Cortex Right) | T(80) = 2.15 | dz = 0.24 | 0.034212 | 0.227046 |
|  | pSMG l (Supramarginal Gyrus, posterior division Left) - HG l (Heschl's Gyrus Left) | T(80) = 2.13 | dz = 0.24 | 0.035935 | 0.228109 |
|  | pSMG r (Supramarginal Gyrus, posterior division Right) - PO l (Parietal Operculum Cortex Left) | T(80) = 2.43 | dz = 0.27 | 0.017134 | 0.312698 |
| Cluster 14/31 | | F(3,78) = 5.99 | | η² = 0.19 | | --- | |  | | 0.000993 | 0.014892 |
|  | AG r (Angular Gyrus Right) - SPL l (Superior Parietal Lobule Left) | T(80) = 5.09 | dz = 0.57 | 0.000002 | 0.000345 |
|  | AG r (Angular Gyrus Right) - aSMG l (Supramarginal Gyrus, anterior division Left) | T(80) = 4.11 | dz = 0.46 | 0.000096 | 0.004686 |
|  | AG r (Angular Gyrus Right) - SPL r (Superior Parietal Lobule Right) | T(80) = 3.48 | dz = 0.39 | 0.000824 | 0.016604 |
|  | AG r (Angular Gyrus Right) - aSMG r (Supramarginal Gyrus, anterior division Right) | T(80) = 3.38 | dz = 0.38 | 0.001137 | 0.016604 |
|  | AG l (Angular Gyrus Left) - aSMG l (Supramarginal Gyrus, anterior division Left) | T(80) = 2.75 | dz = 0.31 | 0.007338 | 0.153046 |
|  | PC (Cingulate Gyrus, posterior division) - aSMG l (Supramarginal Gyrus, anterior division Left) | T(80) = 3.24 | dz = 0.36 | 0.001727 | 0.170943 |
|  | PC (Cingulate Gyrus, posterior division) - aSMG r (Supramarginal Gyrus, anterior division Right) | T(80) = 2.74 | dz = 0.3 | 0.007599 | 0.170943 |
|  | PC (Cingulate Gyrus, posterior division) - SPL l (Superior Parietal Lobule Left) | T(80) = 2.55 | dz = 0.28 | 0.012837 | 0.170943 |
|  | AG l (Angular Gyrus Left) - SPL l (Superior Parietal Lobule Left) | T(80) = 2.49 | dz = 0.28 | 0.014935 | 0.181713 |
|  | AG r (Angular Gyrus Right) - pSMG r (Supramarginal Gyrus, posterior division Right) | T(80) = 2.19 | dz = 0.24 | 0.031537 | 0.200188 |
|  | PC (Cingulate Gyrus, posterior division) - pSMG l (Supramarginal Gyrus, posterior division Left) | T(80) = 2.04 | dz = 0.23 | 0.044714 | 0.289337 |
|  | PC (Cingulate Gyrus, posterior division) - SPL r (Superior Parietal Lobule Right) | T(80) = 2.02 | dz = 0.22 | 0.046416 | 0.289337 |
| Cluster 15/31 | | F(3,78) = 5.81 | | η² = 0.18 | | --- | | 0.001234 | 0.017270 |
|  | Ver45 (Vermis IV, V) - Cereb2 r (Cerebellum Crus2 Right) | T(80) = 3.52 | dz = 0.39 | 0.000725 | 0.038101 |
|  | Ver45 (Vermis IV, V) - Cereb1 r (Cerebellum Crus1 Right) | T(80) = 3.27 | dz = 0.36 | 0.001612 | 0.058831 |
|  | Hippocampus l - Cereb1 l (Cerebellum Crus1 Left) | T(80) = 2.15 | dz = 0.24 | 0.034809 | 0.225096 |
|  | Ver45 (Vermis IV, V) - Cereb1 l (Cerebellum Crus1 Left) | T(80) = 2.27 | dz = 0.25 | 0.025896 | 0.252051 |
|  | Ver45 (Vermis IV, V) - Cereb2 l (Cerebellum Crus2 Left) | T(80) = 2.11 | dz = 0.23 | 0.037941 | 0.276966 |
|  | Cereb45 r (Cerebellum IV, V Right) - Cereb2 r (Cerebellum Crus2 Right) | T(80) = 2.37 | dz = 0.26 | 0.020315 | 0.296605 |
|  | Cereb45 l (Cerebellum IV, V Left) - Cereb2 r (Cerebellum Crus2 Right) | T(80) = 2.44 | | dz = 0.27 | | --- | |  | | 0.016864 | 0.319151 |
|  | Cereb45 l (Cerebellum IV, V Left) - Cereb1 r (Cerebellum Crus1 Right) | T(80) = 2.06 | dz = 0.23 | 0.042502 | 0.344742 |
|  | Cereb45 r (Cerebellum IV, V Right) - Cereb1 l (Cerebellum Crus1 Left) | T(80) = 2.11 | dz = 0.23 | 0.037610 | 0.403621 |
| Cluster 16/31 | | F(3,78) = 5.59 | | η² = 0.18 | | --- | | 0.001591 | 0.020880 |
|  | PaCiG r (Paracingulate Gyrus Right)- Ver7 (Vermis VII) | T(80) = -3.25 | dz =-0.36 | 0.001679 | 0.030793 |
|  | PaCiG l (Paracingulate Gyrus Left)- Ver7 (Vermis VII) | T(80) = -2.79 | dz =-0.31 | 0.006619 | 0.093534 |
|  | PaCiG l (Paracingulate Gyrus Left) - Cereb6 l (Cerebelum VI Left) | T(80) = -2.54 | dz =-0.28 | 0.013169 | 0.107700 |
|  | PaCiG r (Paracingulate Gyrus Right) - Cereb6 r (Cerebellum VI Right) | T(80) = -2.47 | dz =-0.27 | 0.015517 | 0.112125 |
|  | PaCiG l (Paracingulate Gyrus Left) - TOFusC l (Temporal Occipital Fusiform Cortex Left) | T(80) = -2.41 | dz =-0.27 | 0.018244 | 0.133181 |
|  | FP l (Frontal Pole Left) - Ver7 (Vermis VII) | T(80) = -2.62 | dz =-0.29 | 0.010641 | 0.221934 |
|  | PaCiG l (Paracingulate Gyrus Left) - Cereb6 r (Cerebellum VI Right) | T(80) = -2.09 | dz =-0.23 | 0.039697 | 0.222914 |
|  | FP r (Frontal Pole Right) - Ver7 (Vermis VII) | T(80) = -2.15 | dz =-0.24 | 0.034189 | 0.436240 |
| Cluster 17/31 | | F(3,78) = 5.30 | | η² = 0.17 | | --- | | 0.002221 | 0.027441 |
|  | Precuneous (Precuneous Cortex) - SPL l (Superior Parietal Lobule Left) | T(80) = 3.73 | dz = 0.41 | 0.000355 | 0.018992 |
|  | Precuneous (Precuneous Cortex) - aSMG r (Supramarginal Gyrus, anterior division Right) | T(80) = 3.30 | dz = 0.37 | 0.001430 | 0.052180 |
|  | Precuneous (Precuneous Cortex) - pSMG l (Supramarginal Gyrus, posterior division Left) | T(80) = 2.79 | dz = 0.31 | 0.006554 | 0.095695 |
|  | Precuneous (Precuneous Cortex) - SPL r (Superior Parietal Lobule Right) | T(80) = 2.66 | dz = 0.3 | 0.009332 | 0.123858 |
|  | Precuneous (Precuneous Cortex) - aSMG l (Supramarginal Gyrus, anterior division Left) | T(80) = 2.43 | dz = 0.27 | 0.017325 | 0.158091 |
|  | sLOC l (Lateral Occipital Cortex, superior division Left) - pSMG l (Supramarginal Gyrus, posterior division Left) | T(80) = 2.81 | dz = 0.31 | 0.006172 | 0.162510 |
|  | sLOC l (Lateral Occipital Cortex, superior division Left) - SPL l (Superior Parietal Lobule Left) | T(80) = 2.79 | dz = 0.31 | 0.006678 | 0.162510 |
|  | sLOC r (Lateral Occipital Cortex, superior division Right) - SPL l (Superior Parietal Lobule Left) | T(80) = 2.91 | dz = 0.32 | 0.004629 | 0.201186 |
|  | Precuneous (Precuneous Cortex) - pSMG r (Supramarginal Gyrus, posterior division Right) | T(80) = 2.10 | dz = 0.23 | 0.039057 | 0.271540 |
|  | sLOC r (Lateral Occipital Cortex, superior division Right) - pSMG l (Supramarginal Gyrus, posterior division Left) | T(80) = 2.38 | dz = 0.26 | 0.019786 | 0.294401 |
|  | sLOC r (Lateral Occipital Cortex, superior division Right) - SPL r (Superior Parietal Lobule Right) | T(80) = 2.05 | dz = 0.23 | 0.044130 | 0.402682 |
| Cluster 18/31 | | F(3,78) = 5.18 | | η² = 0.17 | | --- | | 0.002562 | 0.027872 |
|  | toITG l (Inferior Temporal Gyrus, temporooccipital part Left) - Cereb1 r (Cerebellum Crus1 Right) | T(80) = 3.01 | dz = 0.33 | 0.003483 | 0.127132 |
|  | toITG l (Inferior Temporal Gyrus, temporooccipital part Left) - Cereb2 l (Cerebellum Crus2 Left) | T(80) = 2.92 | dz = 0.32 | 0.004550 | 0.132851 |
|  | toITG l (Inferior Temporal Gyrus, temporooccipital part Left) - Cereb1 l (Cerebellum Crus1 Left) | T(80) = 2.45 | dz = 0.27 | 0.016553 | 0.164065 |
|  | toITG r (Inferior Temporal Gyrus, temporooccipital part Right) - Cereb1 r (Cerebellum Crus1 Right) | T(80) = 2.66 | dz = 0.3 | 0.009384 | 0.261491 |
|  | toITG r (Inferior Temporal Gyrus, temporooccipital part Right) - Cereb2 r (Cerebellum Crus2 Right) | T(80) = 2.21 | dz = 0.25 | 0.029872 | 0.293515 |
| Cluster 19/31 | | F(3,78) = 5.17 | | η² = 0.17 | | --- | | 0.002592 | 0.027872 |
|  | Caudate l - Cereb6 l (Cerebelum 6 Left) | T(80) = -3.01 | dz =-0.33 | 0.003470 | 0.056291 |
|  | Caudate l - Ver7 (Vermis VII) | T(80) = -2.79 | dz =-0.31 | 0.006596 | 0.083836 |
|  | Caudate l - TOFusC l (Temporal Occipital Fusiform Cortex Left) | T(80) = -2.53 | dz =-0.28 | 0.013288 | 0.109950 |
|  | Caudate l - Cereb6 r (Cerebelum VI Right) | T(80) = -2.47 | dz =-0.27 | 0.015755 | 0.109950 |
|  | Caudate r -Cereb6 l (Cerebellum VI Left) | T(80) = -3.31 | dz =-0.37 | 0.001382 | 0.114692 |
|  | Caudate l - Ver6 (Vermis VI) | T(80) = -2.33 | dz =-0.26 | 0.022557 | 0.121975 |
|  | Caudate r - TOFusC l (Temporal Occipital Fusiform Cortex Left) | T(80) = -2.42 | dz =-0.27 | 0.017764 | 0.221558 |
|  | Thalamus r - Ver6 (Vermis VI) | T(80) = -2.19 | dz =-0.24 | 0.031659 | 0.322123 |
|  | Thalamus r - Cereb6 l (Cerebellum VI Left) | T(80) = -2.10 | dz =-0.23 | 0.039112 | 0.322123 |
|  | Thalamus r - Cereb6 r (Cerebellum VI Right) | T(80) = -2.09 | dz =-0.23 | 0.040219 | 0.322123 |
|  | Putamen r - Cereb6 r (Cerebellum VI Right) | T(80) = -2.00 | dz =-0.22 | 0.049105 | 0.359322 |
|  | Putamen l - Cereb6 r (Cerebellum VI Right) | T(80) = -2.14 | dz =-0.24 | 0.035726 | 0.664397 |
| Cluster 20/31 | | F(3,78) = 5.15 | | η² = 0.17 | | --- | | 0.002654 | 0.027872 |
|  | MidFG r (Middle Frontal Gyrus Right) - Cereb7 l (Cerebellum VIIb Left) | T(80) = -3.28 | dz =-0.36 | 0.001557 | 0.032469 |
|  | MidFG l (Middle Frontal Gyrus Left) - Cereb7 l (Cerebellum VIIb Left) | T(80) = -2.51 | dz =-0.28 | 0.014192 | 0.156449 |
|  | SFG r (Superior Frontal Gyrus Right) - Cereb9 r (Cerebellum IX Right) | T(80) = -2.20 | dz =-0.24 | 0.030959 | 0.205458 |
|  | MidFG r (Middle Frontal Gyrus Right) - Cereb7 r (Cerebellum VIIb Right) | T(80) = -2.13 | dz =-0.24 | 0.036348 | 0.218544 |
|  | MidFG r (Middle Frontal Gyrus Right) - Cereb9 r (Cerebellum IX Right) | T(80) = -2.11 | dz =-0.23 | 0.038232 | 0.218544 |
| Cluster 21/31 | | F(3,78) = 5.05 | | η² = 0.16 | | --- | |  | | 0.002994 | 0.029941 |
|  | Caudate l - Cereb1 r (Cerebellum Crus1 Right) | T(80) = -3.35 | dz =-0.37 | 0.001228 | 0.044815 |
|  | Caudate l - Cereb1 l (Cerebellum Crus1 Left) | T(80) = -2.43 | dz =-0.27 | 0.017438 | 0.109950 |
|  | Caudate r - Cereb1 l (Cerebellum Crus1 Left) | T(80) = -2.39 | dz =-0.27 | 0.019098 | 0.221558 |
|  | Caudate r- Cereb2 l (Cerebellum Crus2 Left) | T(80) = -2.37 | dz =-0.26 | 0.020028 | 0.221558 |
|  | Thalamus r - Cereb2 l (Cerebellum Crus2 Left) | T(80) = -2.78 | dz =-0.31 | 0.006816 | 0.292511 |
|  | Thalamus r - Cereb1 l (Cerebellum Crus1 Left) | T(80) = -2.31 | dz =-0.26 | 0.023215 | 0.313925 |
|  | Thalamus r - Cereb1 r (Cerebellum Crus1 Right) | T(80) = -2.29 | dz =-0.25 | 0.024697 | 0.313925 |
|  | Putamen r - Cereb1 r (Cerebellum Crus1 Right) | T(80) = -2.23 | dz =-0.25 | 0.028466 | 0.319880 |
|  | Pallidum r - Cereb2 r (Cerebellum Crus2 Right) | T(80) = -2.60 | dz =-0.29 | 0.011066 | 0.371431 |
|  | Thalamus l - Cereb2 l (Cerebellum Crus2 Left) | T(80) = -2.01 | dz =-0.22 | 0.048308 | 0.610627 |
|  | Putamen l - Cereb2 r (Cerebellum Crus2 Right) | T(80) = -2.21 | dz =-0.25 | 0.029751 | 0.664397 |
| Cluster 22/31 | | F(3,78) = 4.96 | | η² = 0.16 | | --- | | 0.003319 | 0.031681 |
|  | SMA L(Juxtapositional Lobule Cortex -formerly Supplementary Motor Cortex- Left)- SFG r (Superior Frontal Gyrus Right) | T(80) = 3.82 | dz = 0.42 | 0.000262 | 0.012761 |
|  | PreCG l (Precentral Gyrus Left)- SFG r (Superior Frontal Gyrus Right) | T(80) = 4.03 | dz = 0.45 | 0.000127 | 0.017888 |
|  | PreCG l (Precentral Gyrus Left)- MidFG r (Middle Frontal Gyrus Right) | T(80) = 3.56 | dz = 0.4 | 0.000623 | 0.017888 |
|  | PreCG l (Precentral Gyrus Left)- MidFG l (Middle Frontal Gyrus Left) | T(80) = 3.40 | dz = 0.38 | 0.001061 | 0.022138 |
|  | PreCG r (Precentral Gyrus Right) - MidFG r (Middle Frontal Gyrus Right) | T(80) = 3.83 | dz = 0.43 | 0.000252 | 0.030055 |
|  | PreCG r (Precentral Gyrus Right)- SFG r (Superior Frontal Gyrus Right) | T(80) = 3.69 | dz = 0.41 | 0.000412 | 0.030055 |
|  | SMA r (Juxtapositional Lobule Cortex -formerly Supplementary Motor Cortex- Right) - SFG r (Superior Frontal Gyrus Right) | T(80) = 3.47 | dz = 0.39 | 0.000853 | 0.031132 |
|  | PreCG l (Precentral Gyrus Left)- SFG l (Superior Frontal Gyrus Left) | T(80) = 3.04 | dz = 0.34 | 0.003239 | 0.059119 |
|  | PostCG r (Postcentral Gyrus Right) - SFG l (Superior Frontal Gyrus Left) | T(80) = 3.19 | dz = 0.35 | 0.002062 | 0.060200 |
|  | PostCG r (Postcentral Gyrus Right)- MidFG l (Middle Frontal Gyrus Left) | T(80) = 2.96 | dz = 0.33 | 0.004046 | 0.065634 |
|  | PostCG l (Postcentral Gyrus Left) - SFG l (Superior Frontal Gyrus Left) | T(80) = 3.16 | dz = 0.35 | 0.002256 | 0.071272 |
|  | SMA r (Juxtapositional Lobule Cortex -formerly Supplementary Motor Cortex- Right)- MidFG r (Middle Frontal Gyrus Right) | T(80) = 3.09 | dz = 0.34 | 0.002714 | 0.079249 |
|  | PostCG l (Postcentral Gyrus Left) - SFG r (Superior Frontal Gyrus Right) | T(80) = 3.03 | dz = 0.34 | 0.003290 | 0.080051 |
|  | SMA L(Juxtapositional Lobule Cortex -formerly Supplementary Motor Cortex- Left)- MidFG r (Middle Frontal Gyrus Right) | T(80) = 2.85 | dz = 0.32 | 0.005635 | 0.102831 |
|  | PreCG r (Precentral Gyrus Right) - SFG l (Superior Frontal Gyrus Left) | T(80) = 2.68 | dz = 0.3 | 0.008934 | 0.108701 |
|  | SMA r (Juxtapositional Lobule Cortex -formerly Supplementary Motor Cortex- Right) - SFG l (Superior Frontal Gyrus Left) | T(80) = 2.69 | dz = 0.3 | 0.008708 | 0.150590 |
|  | PostCG r (Postcentral Gyrus Right) - SFG r (Superior Frontal Gyrus Right) | T(80) = 2.55 | dz = 0.28 | 0.012754 | 0.153693 |
|  | PostCG r (Postcentral Gyrus Right) - MidFG r (Middle Frontal Gyrus Right) | T(80) = 2.47 | dz = 0.27 | 0.015501 | 0.158563 |
|  | PostCG l (Postcentral Gyrus Left) - MidFG l (Middle Frontal Gyrus Left) | T(80) = 2.68 | dz = 0.3 | 0.008901 | 0.162449 |
|  | PreCG r (Precentral Gyrus Right) - MidFG l (Middle Frontal Gyrus Left) | T(80) = 2.35 | dz = 0.26 | 0.021072 | 0.192281 |
|  | SMA L(Juxtapositional Lobule Cortex -formerly Supplementary Motor Cortex- Left) - SFG l (Superior Frontal Gyrus Left) | T(80) = 2.20 | dz = 0.24 | 0.030366 | 0.233342 |
| Cluster 23/31 | | F(3,78) = 4.83 | η² = 0.16 | 0.003881 | 0.035434 |
|  | pITG r (Inferior Temporal Gyrus, posterior division Right) - aPaHC l (Parahippocampal Gyrus, anterior division Left) | T(80) = 3.96 | dz = 0.44 | 0.000164 | 0.023937 |
|  | aPaHC l (Parahippocampal Gyrus, anterior division Left)- pTFusC l (Temporal Fusiform Cortex, posterior division Left) | T(80) = 3.56 | dz = 0.4 | 0.000622 | 0.039792 |
|  | aPaHC l (Parahippocampal Gyrus, anterior division Left) - aITG l (Inferior Temporal Gyrus, anterior division Left) | T(80) = 3.48 | dz = 0.39 | 0.000818 | 0.039792 |
|  | pTFusC r (Temporal Fusiform Cortex, posterior division Right) - aITG l (Inferior Temporal Gyrus, anterior division Left) | T(80) = 3.71 | dz = 0.41 | 0.000380 | 0.055467 |
|  | aPaHC l (Parahippocampal Gyrus, anterior division Left) - pITG l (Inferior Temporal Gyrus, posterior division Left) | T(80) = 3.19 | dz = 0.35 | 0.002064 | 0.075330 |
|  | pITG r (Inferior Temporal Gyrus, posterior division Right) - pTFusC l (Temporal Fusiform Cortex, posterior division Left) | T(80) = 3.03 | dz = 0.34 | 0.003296 | 0.076248 |
|  | pITG r (Inferior Temporal Gyrus, posterior division Right) - pTFusC r (Temporal Fusiform Cortex, posterior division Right) | T(80) = 2.68 | dz = 0.3 | 0.008853 | 0.107711 |
|  | pITG r (Inferior Temporal Gyrus, posterior division Right) - pITG l (Inferior Temporal Gyrus, posterior division Left) | T(80) = 2.61 | dz = 0.29 | 0.010792 | 0.113060 |
|  | pTFusC l (Temporal Fusiform Cortex, posterior division Left) - pITG l (Inferior Temporal Gyrus, posterior division Left) | T(80) = 2.64 | dz = 0.29 | 0.010000 | 0.132379 |
|  | aITG l (Inferior Temporal Gyrus, anterior division Left) - pTFusC l (Temporal Fusiform Cortex, posterior division Left) | T(80) = 2.83 | dz = 0.31 | 0.005898 | 0.143509 |
|  | aITG l (Inferior Temporal Gyrus, anterior division Left) - pITG l (Inferior Temporal Gyrus, posterior division Left) | T(80) = 2.64 | dz = 0.29 | 0.009846 | 0.153646 |
|  | pITG r (Inferior Temporal Gyrus, posterior division Right) - aITG r (Inferior Temporal Gyrus, anterior division Right) | T(80) = 2.39 | dz = 0.27 | 0.019428 | 0.157583 |
|  | aITG r (Inferior Temporal Gyrus, anterior division Right) - aPaHC l (Parahippocampal Gyrus, anterior division Left) | T(80) = 3.02 | dz = 0.34 | 0.003390 | 0.188448 |
|  | aITG r (Inferior Temporal Gyrus, anterior division Right) - pTFusC l (Temporal Fusiform Cortex, posterior division Left) | T(80) = 2.75 | dz = 0.31 | 0.007450 | 0.188448 |
|  | pTFusC r (Temporal Fusiform Cortex, posterior division Right) - pITG l (Inferior Temporal Gyrus, posterior division Left) | T(80) = 2.34 | dz = 0.26 | 0.021825 | 0.197484 |
|  | aITG r (Inferior Temporal Gyrus, anterior division Right) - pITG l (Inferior Temporal Gyrus, posterior division Left) | T(80) = 2.63 | dz = 0.29 | 0.010138 | 0.202607 |
|  | aITG r (Inferior Temporal Gyrus, anterior division Right) - aPaHC r (Parahippocampal Gyrus, anterior division Right) | T(80) = 2.44 | dz = 0.27 | 0.016971 | 0.202607 |
|  | aITG r (Inferior Temporal Gyrus, anterior division Right) - aTFusC l (Temporal Fusiform Cortex, anterior division Left) | T(80) = 2.41 | dz = 0.27 | 0.018363 | 0.202607 |
|  | pITG r (Inferior Temporal Gyrus, posterior division Right) - aITG l (Inferior Temporal Gyrus, anterior division Left) | T(80) = 2.24 | dz = 0.25 | 0.028129 | 0.205342 |
|  | aPaHC r (Parahippocampal Gyrus, anterior division Right) - pTFusC l (Temporal Fusiform Cortex, posterior division Left) | T(80) = 2.52 | dz = 0.28 | 0.013892 | 0.244309 |
|  | pTFusC r (Temporal Fusiform Cortex, posterior division Right) - aITG r (Inferior Temporal Gyrus, anterior division Right) | T(80) = 2.02 | dz = 0.22 | 0.046410 | 0.291886 |
|  | aTFusC l (Temporal Fusiform Cortex, anterior division Left) - aITG l (Inferior Temporal Gyrus, anterior division Left) | T(80) = 2.29 | dz = 0.25 | 0.024374 | 0.319862 |
|  | aTFusC l (Temporal Fusiform Cortex, anterior division Left) - pITG l (Inferior Temporal Gyrus, posterior division Left) | T(80) = 2.21 | dz = 0.25 | 0.030250 | 0.319862 |
|  | aPaHC r (Parahippocampal Gyrus, anterior division Right) - pITG l (Inferior Temporal Gyrus, posterior division Left) | T(80) = 2.25 | dz = 0.25 | 0.026944 | 0.327814 |
|  | aTFusC r (Temporal Fusiform Cortex, anterior division Right)- aPaHC r (Parahippocampal Gyrus, anterior division Right) | T(80) = 2.05 | dz = 0.23 | 0.043809 | 0.607193 |
| Cluster 24/31 | | F(3,78) = 4.69 | η² = 0.15 | 0.004620 | 0.040425 |
|  | SFG r (Superior Frontal Gyrus Right) - pMTG r (Middle Temporal Gyrus, posterior division Right) | T(80) = -4.05 | dz =-0.45 | 0.000118 | 0.004741 |
|  | SFG r (Superior Frontal Gyrus Right) - FOrb r (Frontal Orbital Cortex Right) | T(80) = -2.87 | dz =-0.32 | 0.005198 | 0.047436 |
|  | SFG l (Superior Frontal Gyrus Left) - pMTG l (Middle Temporal Gyrus, posterior division Left) | T(80) = -3.03 | dz =-0.34 | 0.003261 | 0.059522 |
|  | SFG r (Superior Frontal Gyrus Right) - pMTG l (Middle Temporal Gyrus, posterior division Left) | T(80) = -2.42 | dz =-0.27 | 0.017965 | 0.124901 |
|  | SFG l (Superior Frontal Gyrus Left) - pMTG r (Middle Temporal Gyrus, posterior division Right) | T(80) = -2.47 | dz =-0.27 | 0.015522 | 0.151565 |
|  | SFG l (Superior Frontal Gyrus Left) - FOrb r (Frontal Orbital Cortex Right) | T(80) = -2.35 | dz =-0.26 | 0.021342 | 0.151565 |
|  | SFG l (Superior Frontal Gyrus Left) - FOrb l (Frontal Orbital Cortex Left) | T(80) = -2.14 | dz =-0.24 | 0.035008 | 0.196586 |
|  | MidFG l (Middle Frontal Gyrus Left) - FOrb l (Frontal Orbital Cortex Left) | T(80) = -2.13 | dz =-0.24 | 0.036263 | 0.264723 |
|  | MidFG l (Middle Frontal Gyrus Left) - pMTG l (Middle Temporal Gyrus, posterior division Left) | T(80) = -2.10 | dz =-0.23 | 0.039114 | 0.271934 |
| Cluster 25/31 | | F(2,79) = 5.64 | η² = 0.12 | 0.005130 | 0.043093 |
|  | PaCiG l (Paracingulate Gyrus Left)- PaCiG r (Paracingulate Gyrus Right) | T(80) = 2.55 | dz = 0.28 | 0.012536 | 0.107700 |
|  | FP l (Frontal Pole Left) - PaCiG l (Paracingulate Gyrus Left) | T(80) = 3.03 | dz = 0.34 | 0.003260 | 0.142220 |
|  | FP l (Frontal Pole Left) - PaCiG r (Paracingulate Gyrus Right) | T(80) = 2.88 | dz = 0.32 | 0.005113 | 0.142220 |
|  | FP r (Frontal Pole Right) - PaCiG l (Paracingulate Gyrus Left) | T(80) = 3.22 | dz = 0.36 | 0.001829 | 0.220677 |
|  | FP r (Frontal Pole Right) -atlas.FP l (Frontal Pole Left) T(80) = 2.92 0.004534 0.220677 | T(80) = 2.92 | dz = 0.32 | 0.004534 | 0.220677 |
|  | FP r (Frontal Pole Right) - PaCiG r (Paracingulate Gyrus Right) | T(80) = 2.70 | dz = 0.3 | 0.008401 | 0.306627 |
| Cluster 26/31 | | F(3,78) = 4.55 | η² = 0.15 | 0.005409 | 0.043313 |
|  | MidFG r (Middle Frontal Gyrus Right) - PT r (Planum Temporale Right) | T(80) = 2.78 | dz = 0.31 | 0.006851 | 0.069705 |
|  | MidFG r (Middle Frontal Gyrus Right) - CO r (Central Opercular Cortex Right) | T(80) = 2.76 | dz = 0.31 | 0.007161 | 0.069705 |
|  | MidFG r (Middle Frontal Gyrus Right) - PO l (Parietal Operculum Cortex Left) | T(80) = 2.51 | dz = 0.28 | 0.014004 | 0.109374 |
|  | MidFG r (Middle Frontal Gyrus Right) - PO r (Parietal Operculum Cortex Right) | T(80) = 2.47 | dz = 0.27 | 0.015462 | 0.109374 |
|  | MidFG l (Middle Frontal Gyrus Left) - PO r (Parietal Operculum Cortex Right) | T(80) = 2.20 | dz = 0.24 | 0.030792 | 0.236613 |
| Cluster 27/31 | | F(3,78) = 4.53 | 0.005569 | η² = 0.15 | 0.043313 |
|  | AG r (Angular Gyrus Right) - Cereb2 l (Cerebellum Crus2 Left) | T(80) = -2.52 | dz =-0.28 | 0.013728 | 0.106179 |
|  | AG r (Angular Gyrus Right) - Cereb2 r (Cerebellum Crus2 Right) | T(80) = -2.42 | dz =-0.27 | 0.017929 | 0.118983 |
|  | PC (Cingulate Gyrus, posterior division) - Cereb2 r (Cerebellum Crus2 Right) | T(80) = -2.55 | dz =-0.28 | 0.012627 | 0.170943 |
|  | PC (Cingulate Gyrus, posterior division)- Cereb2 l (Cerebellum Crus2 Left) | T(80) = -2.27 | dz =-0.25 | 0.025987 | 0.232042 |
|  | AG l (Angular Gyrus Left) - Cereb2 r (Cerebellum Crus2 Right) | T(80) = -2.03 | dz =-0.23 | 0.045266 | 0.315360 |
| Cluster 28/31 | | F(3,78) = 4.44 | η² = 0.15 | 0.006180 | 0.046348 |
|  | Caudate l -Cereb10 r (Cerebellum X Right) | T(80) = -3.20 | dz =-0.36 | 0.001990 | 0.049127 |
|  | Caudate l -AAN_DorsalRaphe | T(80) = 2.72 | dz = 0.3 | 0.008039 | 0.083836 |
|  | Caudate l -AAN_mesRF_L (Mesencephalic reticular formation Left) | T(80) = 2.44 | dz = 0.27 | 0.016913 | 0.109950 |
|  | Caudate r - AAN_PBC_L (Parabrachial complex Left) | T(80) = -3.27 | dz =-0.36 | 0.001571 | 0.114692 |
|  | Accumbens r - Cereb10 r (Cerebellum X Right) | T(80) = -3.24 | dz =-0.36 | 0.001727 | 0.126041 |
|  | Caudate r - Cereb10 r (Cerebellum X Right) | T(80) = -2.33 | dz =-0.26 | 0.022062 | 0.221558 |
|  | Thalamus r -AAN_LDTg_L (Laterodorsal Tegmental Nucleus Left) | T(80) = -2.60 | dz =-0.29 | 0.011053 | 0.292511 |
|  | Putamen r - Cereb10 r (Cerebellum X Right) | T(80) = -2.12 | dz =-0.24 | 0.037004 | 0.319880 |
|  | Putamen r - Ver12 (Vermis I, II) | T(80) = -2.08 | dz =-0.23 | 0.040597 | 0.329285 |
|  | Pallidum l - Ver12 (Vermis I, II) | T(80) = -2.73 | dz = -0.3 | 0.007739 | 0.354967 |
|  | Pallidum r -AAN_DorsalRaphe | T(80) = -2.42 | dz =-0.27 | 0.017808 | 0.371431 |
|  | Pallidum l -AAN_LC_L (Locus Coeruleus Left) | T(80) = 2.29 | dz = 0.25 | 0.024517 | 0.417693 |
|  | Pallidum l_ Cereb10 l (Cerebellum X Left) | T(80) = 2.27 | dz = 0.25 | 0.025748 | 0.417693 |
|  | Putamen l - Ver12 (Vermis I, II) | T(80) = -2.71 | dz = -0.3 | 0.008214 | 0.599649 |
| Cluster 29/31 | | F(3,78) = 4.35 | η² = 0.14 | 0.006913 | 0.048512 |
|  | Ver45 (Vermis IV, V) - Cereb7 r (Cerebellum VIIb Right) | T(80) = 3.49 | dz = 0.39 | 0.000783 | 0.038101 |
|  | Ver45 (Vermis IV, V) - Cereb8 r (Cerebellum VIII Right) | T(80) = 3.01 | dz = 0.33 | 0.003507 | 0.073151 |
|  | Hippocampus l - Cereb7 l (Cerebellum VIIb Left) | T(80) = 2.80 | dz = 0.31 | 0.006450 | 0.144797 |
|  | Hippocampus l - Cereb7 r (Cerebellum VIIb Right) | T(80) = 2.61 | dz = 0.29 | 0.010949 | 0.144797 |
|  | Hippocampus l - Cereb8 r (Cerebellum VIII Right) | T(80) = 2.51 | dz = 0.28 | 0.013994 | 0.145937 |
|  | Ver45 (Vermis IV, V) - Ver8 (Vermis VIII) | T(80) = 2.51 | dz = 0.28 | 0.013927 | 0.184853 |
|  | Cereb45 r (Cerebellum IV, V Right) - Cereb8 r (Cerebellum VIII Right) | T(80) = 2.78 | dz = 0.31 | 0.006798 | 0.198508 |
|  | Hippocampus r - Ver9 (Vermis IX) | T(80) = 2.14 | dz = 0.24 | 0.035433 | 0.262442 |
|  | Hippocampus r - Ver8 (Vermis VIII) | T(80) = 2.03 | dz = 0.23 | 0.045315 | 0.279906 |
|  | Cereb45 r (Cerebellum IV, V Right) - Cereb8 l (Cerebellum VIII Left) | T(80) = 2.54 | dz = 0.28 | 0.013076 | 0.287432 |
|  | Cereb45 l (Cerebellum IV, V Left) - Cereb7 l (Cerebellum VIIb Left) | T(80) = 2.45 | dz = 0.27 | 0.016582 | 0.319151 |
|  | Cereb45 l (Cerebellum IV, V Left) - Cereb8 r (Cerebellum VIII Right) | T(80) = 2.23 | dz = 0.25 | 0.028418 | 0.319151 |
|  | Cereb3 r (Cerebellum III Right) - Cereb8 r (Cerebellum VIII Right) | T(80) = 2.54 | dz = 0.28 | 0.012979 | 0.399267 |
| Cluster 30/31 | | F(3,78) = 4.34 | η² = 0.14 | 0.007032 | 0.048512 |
|  | Cereb1 r (Cerebellum Crus1 Right) - Ver6 (Vermis VI) | T(80) = 4.43 | dz = 0.49 | 0.000030 | 0.002175 |
|  | Cereb1 r (Cerebellum Crus1 Right) - Cereb6 r (Cerebellum VI Right) | T(80) = 3.70 | dz = 0.41 | 0.000400 | 0.011688 |
|  | Cereb1 r (Cerebellum Crus1 Right) - Cereb6 l (Cerebellum VI Left) | T(80) = 3.30 | dz = 0.37 | 0.001442 | 0.020529 |
|  | Cereb2 r (Cerebellum Crus2 Right) - Ver6 (Vermis VI) | T(80) = 3.24 | dz = 0.36 | 0.001758 | 0.024368 |
|  | Cereb2 l (Cerebellum Crus2 Left) - Ver6 (Vermis VI) | T(80) = 3.41 | dz = 0.38 | 0.001023 | 0.029869 |
|  | Cereb2 r (Cerebellum Crus2 Right) - Cereb6 r (Cerebellum VI Right) | T(80) = 2.96 | dz = 0.33 | 0.004106 | 0.042817 |
|  | Cereb2 l (Cerebellum Crus2 Left) - Cereb6 l (Cerebellum VI Left) | T(80) = 2.92 | dz = 0.32 | 0.004588 | 0.055820 |
|  | Cereb2 r (Cerebellum Crus2 Right) - Cereb6 l (Cerebellum VI Left) | T(80) = 2.51 | dz = 0.28 | 0.014252 | 0.080029 |
|  | Cereb2 r (Cerebellum Crus2 Right) - Ver7 (Vermis VII) | T(80) = 2.48 | dz = 0.28 | 0.015366 | 0.080121 |
|  | Cereb2 l (Cerebellum Crus2 Left) - Ver7 (Vermis VII) | T(80) = 2.55 | dz = 0.28 | 0.012641 | 0.097139 |
|  | Cereb1 l (Cerebellum Crus1 Left) - Cereb6 r (Cerebellum VI Right) | T(80) = 2.84 | dz = 0.32 | 0.005755 | 0.100956 |
|  | Cereb2 r (Cerebellum Crus2 Right) - TOFusC r (Temporal Occipital Fusiform Cortex Right) | T(80) = 2.30 | dz = 0.26 | 0.023761 | 0.102750 |
|  | Cereb1 l (Cerebellum Crus1 Left) - Cereb6 l (Cerebellum VI Left) | T(80) = 2.71 | dz = 0.3 | 0.008173 | 0.108471 |
|  | Cereb2 l (Cerebellum Crus2 Left) - Cereb6 r (Cerebellum VI Right) | T(80) = 2.37 | dz = 0.26 | 0.020328 | 0.114151 |
|  | Cereb1 l (Cerebellum Crus1 Left) - Ver6 (Vermis VI) | T(80) = 2.53 | dz = 0.28 | 0.013290 | 0.127745 |
| Cluster 31/31 | | F(3,78) = 4.32 | η² = 0.14 | 0.007161 | 0.048512 |
|  | pITG l (Inferior Temporal Gyrus, posterior division Left) - Cereb8 l (Cerebellum VIII Left) | T(80) = 3.25 | dz = 0.36 | 0.001696 | 0.075330 |
|  | aITG l (Inferior Temporal Gyrus, anterior division Left) - Cereb7 l (Cerebellum VIIb Left) | T(80) = 3.27 | dz = 0.36 | 0.001569 | 0.076367 |
|  | pTFusC l (Temporal Fusiform Cortex, posterior division Left) - Cereb7 r (Cerebellum VIIb Right) | T(80) = 2.80 | dz = 0.31 | 0.006450 | 0.108776 |
|  | aITG l (Inferior Temporal Gyrus, anterior division Left) - Cereb8 r (Cerebellum VIII Right) | T(80) = 3.03 | dz = 0.34 | 0.003342 | 0.121520 |
|  | aITG l (Inferior Temporal Gyrus, anterior division Left) - Cereb8 l (Cerebellum VIII Left) | T(80) = 2.95 | dz = 0.33 | 0.004162 | 0.121520 |
|  | pITG l (Inferior Temporal Gyrus, posterior division Left) - Cereb9 l (Cerebellum IX Left) | T(80) = 2.54 | dz = 0.28 | 0.013030 | 0.126821 |
|  | pTFusC r (Temporal Fusiform Cortex, posterior division Right) - Cereb9 l (Cerebellum IX Left) | T(80) = 3.00 | dz = 0.33 | 0.003572 | 0.130388 |
|  | pTFusC l (Temporal Fusiform Cortex, posterior division Left) - Cereb7 l (Cerebellum VIIb Left) | T(80) = 2.55 | dz = 0.28 | 0.012716 | 0.135216 |
|  | pITG l (Inferior Temporal Gyrus, posterior division Left) - Ver8 (Vermis VIII) | T(80) = 2.37 | dz = 0.26 | 0.020019 | 0.144836 |
|  | aITG l (Inferior Temporal Gyrus, anterior division Left) - Cereb7 r (Cerebellum VIIb Right) | T(80) = 2.69 | dz = 0.3 | 0.008588 | 0.153646 |
|  | pITG l (Inferior Temporal Gyrus, posterior division Left) - Ver9 (Vermis IX) | T(80) = 2.07 | dz = 0.23 | 0.041733 | 0.179207 |
|  | aITG r (Inferior Temporal Gyrus, anterior division Right) - Cereb7 l (Cerebellum VIIb Left) | T(80) = 3.10 | dz = 0.34 | 0.002640 | 0.188448 |
|  | pITG l (Inferior Temporal Gyrus, posterior division Left) - Cereb7 r (Cerebellum VIIb Right) | T(80) = 2.01 | dz = 0.22 | 0.048226 | 0.195582 |
|  | pTFusC r (Temporal Fusiform Cortex, posterior division Right) - Cereb8 l (Cerebellum VIII Left) | T(80) = 2.34 | dz = 0.26 | 0.021740 | 0.197484 |
|  | pTFusC r (Temporal Fusiform Cortex, posterior division Right) - Cereb7 l (Cerebellum VIIb Left) | T(80) = 2.30 | dz = 0.26 | 0.023969 | 0.197484 |
|  | pTFusC r (Temporal Fusiform Cortex, posterior division Right) - Cereb7 r (Cerebellum VIIb Right) | T(80) = 2.30 | dz = 0.26 | 0.024347 | 0.197484 |
|  | aITG r (Inferior Temporal Gyrus, anterior division Right) - Cereb8 r (Cerebellum VIII Right) | T(80) = 2.50 | dz = 0.28 | 0.014583 | 0.202607 |
|  | aITG r (Inferior Temporal Gyrus, anterior division Right) - Cereb7 r (Cerebellum VIIb Right) | T(80) = 2.44 | dz = 0.27 | 0.016786 | 0.202607 |
|  | aTFusC l (Temporal Fusiform Cortex, anterior division Left) - Cereb9 r (Cerebellum IX Right) | T(80) = 2.57 | dz = 0.29 | 0.012012 | 0.274754 |
|  | pTFusC l (Temporal Fusiform Cortex, posterior division Left) - Cereb8 l (Cerebelum VIII Left) | T(80) = 1.99 | dz = 0.22 | 0.049732 | 0.282015 |
|  | pITG r (Inferior Temporal Gyrus, posterior division Right) - Ver8 (Vermis VIII) | T(80) = 2.06 | dz = 0.23 | 0.042810 | 0.284101 |
|  | pTFusC r (Temporal Fusiform Cortex, posterior division Right) - Cereb8 r (Cerebellum VIII Right) | T(80) = 1.99 | dz = 0.22 | 0.049980 | 0.291886 |
|  | aPaHC r (Parahippocampal Gyrus, anterior division Right) - Cereb9 l (Cerebellum IX Left) | T(80) = 2.00 | dz = 0.22 | 0.048765 | 0.474644 |

| Clusters | Connections | Statistic | Effect sizes | p-unc | p-FDR |
| --- | --- | --- | --- | --- | --- |
| **PTSD +DS > Controls** | | | | | |
| **Neutral Memory Retrieval:** | | | | | |
| *n.s.* | | | | | |
| **Traumatic Memory Retrieval:** | | | | | |
| Cluster 1/171 | | F(2,39) = 12.33 | η² = 0.39 | 0.000071 | 0.012103 |
|  | AC (Cingulate Gyrus, anterior division) --- Cereb6 r (Cerebelum 6 Right) | T(40) = -3.94 | dz =-0.62 | 0.000320 | 0.026008 |
|  | AC (Cingulate Gyrus, anterior division) --- Cereb6 l (Cerebelum 6 Left) | T(40) = -3.51 | dz =-0.55 | 0.001134 | 0.033126 |
|  | AC (Cingulate Gyrus, anterior division) --- Ver7 (Vermis 7) | T(40) = -3.32 | dz =-0.52 | 0.001939 | 0.040450 |
|  | AC (Cingulate Gyrus, anterior division) --- TOFusC l (Temporal Occipital Fusiform Cortex Left) | T(40) = -2.51 | dz =-0.39 | 0.016156 | 0.131047 |
|  | IFG tri r (Inferior Frontal Gyrus, pars triangularis Right) – TOFusc r (Temporal Occipital Fusiform Cortex Right) | T(40) = 2.39 | dz = 0.37 | 0.021724 | 0.487730 |
| Cluster 2/13 | | F(2,39) = 9.74 | η² = 0.33 | 0.000371 | 0.022009 |
|  | AG l (Angular Gyrus Left) – sLOC l (Lateral Occipital Cortex, superior division Left) | T(40) = 5.03 | dz = 0.79 | 0.000011 | 0.001556 |
|  | AG r (Angular Gyrus Right) – sLOC l (Lateral Occipital Cortex, superior division Left) | T(40) = 3.94 | dz = 0.62 | 0.000314 | 0.045803 |
|  | AG l (Angular Gyrus Left) – sLOC l (Lateral Occipital Cortex, superior division Right) | T(40) = 2.93 | dz = 0.46 | 0.005573 | 0.143836 |
|  | AG l (Angular Gyrus Left) – Precuneous (Precuneous Cortex) | T(40) = 2.61 | dz = 0.41 | 0.012739 | 0.169083 |
|  | AG r (Angular Gyrus Right) – sLOC r (Lateral Occipital Cortex, superior division Right) | T(40) = 2.35 | dz = 0.37 | 0.023846 | 0.267811 |
| Cluster 3/13 | | F(2,39) = 9.36 | η² = 0.32 | 0.000478 | 0.022009 |
|  | Hippocampus l – Cereb1 l (Cerebellum Crus1 Left) | T(40) = 4.52 | dz = 0.71 | 0.000055 | 0.007328 |
|  | Hippocampus l – Cereb2 l (Cerebellum Crus2 Left) | T(40) = 4.32 | dz = 0.67 | 0.000100 | 0.007328 |
|  | Hippocampus r – Ver9 (Vermis IX) | T(40) = 4.07 | dz = 0.64 | 0.000212 | 0.015478 |
|  | Hippocampus l – Ver8 (Vermis VIII) | T(40) = 3.93 | dz = 0.61 | 0.000331 | 0.016099 |
|  | Amygdala r – Cereb1 r (Cerebellum Crus1 Right) | T(40) = 3.61 | dz = 0.56 | 0.000836 | 0.060999 |
|  | aPaHC l (Parahippocampal Gyrus, anterior division Left) – Cereb2 l (Cerebellum Crus2 Left) | T(40) = 3.16 | dz = 0.49 | 0.003032 | 0.063249 |
|  | Hippocampus l – Cereb7 l (Cerebellum VIIb Left) | T(40) = 3.04 | dz = 0.47 | 0.004108 | 0.066641 |
|  | Hippocampus l – Cereb8 r (Cerebellum XIII Right) | T(40) = 2.97 | dz = 0.46 | 0.005044 | 0.076595 |
|  | pTFusC l (Temporal Fusiform Cortex, posterior division Left) – Cereb7 r (Cerebellum VIIb Right) | T(40) = 3.69 | dz = 0.58 | 0.000661 | 0.076595 |
|  | Hippocampus l – Cereb7 r (Cerebellum VIIb Right) | T(40) = 2.88 | dz = 0.45 | 0.006421 | 0.078124 |
|  | Amygdala r – Cereb1 l (Cerebellum Crus1 Left) | T(40) = 3.11 | dz = 0.49 | 0.003429 | 0.093634 |
|  | aPaHC l (Parahippocampal Gyrus, anterior division Left) – Cereb1 l (Cerebellum Crus1 Left) | T(40) = 2.69 | dz = 0.42 | 0.010303 | 0.115706 |
|  | Amygdala r – Cereb2 r (Cerebellum Crus2 Right) | T(40) = 2.87 | dz = 0.45 | 0.006580 | 0.120078 |
|  | Caudate l – Cereb1 l (Cerebellum Crus1 Left) | T(40) = 2.64 | dz =-0.41 | 0.011775 | 0.124489 |
|  | Caudate l – Cereb1 r (Cerebellum Crus1 Right) | T(40) = -2.60 | dz =-0.41 | 0.013002 | 0.126549 |
|  | Hippocampus l – Cereb8 l (Cerebellum XIII Left) | T(40) = 2.49 | dz = 0.39 | 0.016898 | 0.129851 |
|  | aPaHc l (Parahippocampal Gyrus, anterior division Left) – Ver8 (Vermis VIII) | T(40) = 2.61 | dz = 0.41 | 0.012644 | 0.131864 |
|  | AAN_PAG (Periaqueductal Gray) – Ver8 (Vermis 8) | T(40) = 2.69 | dz = 0.42 | 0.010491 | 0.139246 |
|  | Hippocampus r – Cereb2 l (Cerebellum Crus2 Left) | T(40) = 2.86 | dz = 0.45 | 0.006697 | 0.139681 |
|  | Caudate r – Ver 9 (Vermis 9) | T(40) = -2.64 | dz =-0.41 | 0.011784 | 0.145815 |
|  | Caudate r – Cereb2 l (Cerebellum Crus2 Left) | T(40) = -2.54 | dz = -0.4 | 0.014981 | 0.145815 |
|  | aPaHC l (Parahippocampal Gyrus, anterior division Left) – Cereb1 r (Cerebellum Crus1 Right) | T(40) =2.53 | dz = 0.4 | 0.015453 | 0.150409 |
|  | aPaHC l (Parahippocampal Gyrus, anterior division Left) – Ver9 (Vermis IX) | T(40) =2.38 | dz = 0.37 | 0.022050 | 0.150634 |
|  | Hippocampus r – Cereb2 r (Cerebellum Crus2 Right) | T(40) = 2.73 | dz = 0.43 | 0.009445 | 0.161604 |
|  | pTFusC l (Temporal Fusiform Cortex, posterior division Left) – Cereb7 l (Cerebellum VIIb Left) | T(40) = 2.87 | dz = 0.45 | 0.006503 | 0.164569 |
|  | ptFusC l (Temporal Fusiform Cortex, posterior division Left) – Cereb2 l (Cerebellum Crus2 Left) | T(40) = 2.87 | dz = 0.45 | 0.006515 | 0.164569 |
|  | aPaHC l (Parahippocampal Gyrus, anterior division Left) – Cereb7 l (Cerebellum VIIb Left) | T(40) = 2.87 | dz = 0.35 | 0.006503 | 0.164569 |
|  | Caudate r – Cereb1 l (Cerebellum Crus1 Left) | T(40) = -2.44 | dz =-0.38 | 0.019320 | 0.166551 |
|  | Hippocampus r – Ver8 (Vermis VIII) | T(40) = 2.64 | dz = 0.41 | 0.011775 | 0.171920 |
|  | Caudate l – Ver9 (Vermis IX) | T(40) = -2.37 | dz =-0.37 | 0.022435 | 0.181972 |
|  | Hippocampus l – Cereb1 r (Cerebellum Crus1 Right) | T(40) = 2.27 | dz = 0.35 | 0.028926 | 0.183619 |
|  | pTFusC l (Temporal Fusiform Cortex, posterior division Left) – Cereb2 r (Cerebellum Crus2 Right) | T(40) = 2.46 | dz = 0.38 | 0.018506 | 0.207837 |
|  | Caudate l – Cereb8 r (Cerebellum 8 Right) | T(40) = -2.16 | dz =-0.34 | 0.037012 | 0.207839 |
|  | aPaHC r (Parahippocampal Gyrus, anterior division Right) – Cereb2 l (Cerebellum Crus2 Left) | T(40) = 3.21 | dz = 0.5 | 0.002636 | 0.207987 |
|  | Caudate l – Cereb2 r (Cerebellum Crus2 Right) | T(40) = -2.11 | dz =-0.33 | 0.041013 | 0.218958 |
|  | Amygdala r – Cereb2 l (Cerebellum Crus2 Left) | T(40) = 2.43 | dz = 0.38 | 0.019506 | 0.219064 |
|  | pITG r (Inferior Temporal Gyrus, posterior division Right) – Cereb2 r (Cerebellum Crus2 Right) | T(40) = 2.88 | dz = 0.45 | 0.006429 | 0.228944 |
|  | pTFusC l (Temporal Fusiform Cortex, posterior division Left) – Ver8 (Vermis XIII) | T(40) = 2.36 | dz = 0.37 | 0.023207 | 0.242016 |
|  | pTFusC l (Temporal Fusiform Cortex, posterior division Left) – Cereb1 l (Cerebellum Crus1 Left) | T(40) = 2.28 | dz = 0.36 | 0.028105 | 0.255061 |
|  | pTFusC l (Temporal Fusiform Cortex, posterior division Left) – Cereb8 l (Cerebellum XIII Left) | T(40) = 2.23 | dz = 0.35 | 0.031138 | 0.255061 |
|  | aPaHC r (Parahippocampal Gyrus, anterior division Right) – Cereb1 l (Cerebellum Crus1 Left) | T(40) = 2.56 | dz = 0.4 | 0.014418 | 0.263134 |
|  | pITG r (Inferior Temporal Gyrus, posterior division Right) – Cereb1 r (Cerebellum Crus1 Right) | T(40) = 2.37 | dz = 0.37 | 0.022730 | 0.266415 |
|  | Thalamus r – Cereb1 l (Cerebellum Crus1 Left) | T(40) = -2.50 | dz =-0.39 | 0.016639 | 0.272467 |
|  | Thalamus r – Cereb2 l (Cerebellum Crus2 Left) | T(40) = -2.41 | dz =-0.38 | 0.020568 | 0.272467 |
|  | AAN_PAG (Periaqueductal Gray) – Cereb2 l (Cerebellum Crus2 Left) | T(40) = 2.10 | dz = 0.33 | 0.041782 | 0.321065 |
|  | pTFusC r (Temporal Fusiform Cortex, posterior division Right) – Cereb7 r (Cerebellum VIIb Right) | T(40) = 2.45 | dz = 0.38 | 0.018761 | 0.324582 |
|  | pTFusC r (Temporal Fusiform Cortex, posterior division Right) – Cereb2 r (Cerebellum Crus2 Right) | T(40) = 2.28 | dz = 0.36 | 0.028226 | 0.324582 |
|  | pTFusC r (Temporal Fusiform Cortex, posterior division Right) – Cereb1 r (Cerebellum Crus1 Right) | T(40) = 2.19 | dz = 0.34 | 0.034773 | 0.324582 |
|  | pTFusC r (Temporal Fusiform Cortex, posterior division Right) – Cereb7 l (Cerebellum 7b Left) | T(40) = 2.13 | dz = 0.33 | 0.039243 | 0.324582 |
|  | pTFusC r (Temporal Fusiform Cortex, posterior division Right) – Cereb1 l (Cerebellum Crus1 Left) | T(40) = 2.13 | dz = 0.33 | 0.039781 | 0.324582 |
|  | pTFusC r (Temporal Fusiform Cortex, posterior division Right) – Cereb2 l (Cerebellum Crus2 Left) | T(40) = 2.11 | dz = 0.33 | 0.041525 | 0.324582 |
|  | aITG r (Inferior Temporal Gyrus, anterior division Right) – Cereb2 l (Cerebellum Crus2 Left) | T(40) = 2.13 | dz = 0.33 | 0.039399 | 0.338364 |
|  | AAN_PAG (Periaqueductal Gray) – Cereb7 l (Cerebellum VIIb Left) | T(40) = 2.03 | dz = 0.32 | 0.049512 | 0.344229 |
|  | Pallidum r – Ver9 (Vermis IX) | T(40) = -2.83 | dz =-0.44 | 0.007295 | 0.391324 |
|  | Thalamus l – Cereb7 l (Cerebellum VIIb Left) | T(40) = -2.30 | dz =-0.36 | 0.026582 | 0.420807 |
|  | AAN_MedRaphe (Median Raphe) – Cereb7 l (Cerebellum VIIb Left) | T(40) = 2.37 | dz = 0.37 | 0.022949 | 0.433370 |
|  | AAN MedRaphe (Median Raphe) – Cereb8 l (cerebellum 8 Left) | T(40) = 2.36 | dz = 0.37 | 0.023467 | 0.433370 |
|  | Pallidum r – Cereb2 r (Cerebellum Crus2 Right) | T(40) = -2.28 | dz =-0.36 | 0.027800 | 0.450972 |
|  | Ver12 (Vermis I & II) – Cereb1 l (Cerebellum Crus1 Left) | T(40) = 2.51 | dz = 0.39 | 0.016397 | 0.456301 |
|  | aTFusC r (Temporal Fusiform Cortex, anterior division Right) – Cereb1 l (Cerebellum Crus1 Left) | T(40) = 2.22 | dz = 0.35 | 0.031912 | 0.473600 |
|  | Putamen r – Cereb2 l (Cerebellum Crus2 Left) | T(40) = -2.05 | dz =-0.32 | 0.046922 | 0.484965 |
|  | pPaHC r (Parahippocampal gyrus, posterior division Right) – Cereb1 l (Cerebellum Crus1 Left) | T(40) = 2.16 | dz = 0.34 | 0.036986 | 0.559193 |
|  | AAN_PontRF_R (Pontine Reticular Formation Right) – Cereb7 l (Cerebellum 7b Left) | T(40) = 2.46 | dz = 0.38 | 0.018234 | 0.690058 |
|  | AAN_PontRF_R (Pontine Reticular Formation Right) – Cereb1 l (Cerebellum Crus1 Left) | T(40) = 2.35 | dz = 0.37 | 0.023813 | 0.690058 |
|  | Dorsal Raphe – Cereb1 r (Cerebellum Crus1 Right) | T(40) = 2.67 | dz = 0.42 | 0.010890 | 0.702659 |
| Cluster 4/13 | | F(2,39) = 9.25 | η² = 0.32 | 0.000515 | 0.022009 |
|  | Cereb9 l (Cerebellum IX Left) - Cereb6 r (Cerebellum VI Right) | T(40) = 3.19 | dz = 0.5 | 0.002765 | 0.117889 |
|  | Cereb9 l (Cerebellum IX Left)- Ver7 (Vermis VII) | T(40) = 3.13 | dz = 0.49 | 0.003230 | 0.117889 |
|  | Cereb9 r (Cerebellum IX Right)- Ver7 (Vermis VII) | T(40) = 3.25 | dz = 0.51 | 0.002328 | 0.124821 |
|  | Cereb9 l (Cerebellum IX Left)- Cereb6 l (Cerebellum VI Left) | T(40) = 2.42 | dz = 0.38 | 0.020155 | 0.285634 |
|  | Cereb9 l (Cerebellum IX Left) - Ver6 (Vermis VI) | T(40) = 2.36 | dz = 0.37 | 0.023477 | 0.285634 |
|  | Cereb9 r (Cerebellum IX Right) - Cereb6 r (Cerebellum VI Right) | T(40) = 2.37 | dz = 0.37 | 0.022488 | 0.328331 |
|  | Ver10 (Vermis X) - Ver7 (Vermis VII) | T(40) = 3.02 | dz = 0.47 | 0.004423 | 0.539818 |
|  | Cereb10 l (Cerebellum X Left) - TOFusC l (Temporal Occipital Fusiform Cortex Left) | T(40) = 2.28 | dz = 0.36 | 0.028180 | 0.607467 |
|  | Cereb10 l (Cerebellum X Left) - Cereb6 l (Cerebellum VI Left) | T(40) = 2.15 | dz = 0.34 | 0.037812 | 0.613398 |
|  | Ver10 (Vermis X) - Cereb6 r (Cerebellum VI Right) | T(40) = 2.08 | dz = 0.32 | 0.043893 | 0.629067 |
| Cluster 5/13 | | F(2,39) = 8.44 | η² = 0.3 | 0.000902 | 0.024238 |
|  | PostCG r (Postcentral Gyrus Right) - Cereb1 r (Cerebellum Crus1 Right) | T(40) = 3.05 | dz = 0.48 | 0.003999 | 0.138009 |
|  | PostCG r (Postcentral Gyrus Right) - Cereb8 l (Cerebellum VIII Left) | T(40) = -2.86 | dz =-0.45 | 0.006707 | 0.163214 |
|  | aSMG r (Supramarginal Gyrus, anterior division Right) - Cereb8 l (Cerebelum VIII Left) | T(40) = -3.02 | dz =-0.47 | 0.004404 | 0.282398 |
|  | aSMG r (Supramarginal Gyrus, anterior division Right) - Cereb2 r (Cerebellum Crus2 Right) | T(40) = 2.51 | dz = 0.39 | 0.016119 | 0.282398 |
|  | PreCG r (Precentral Gyrus Right) - Cereb8 l (Cerebellum VIII Left) | T(40) = -2.24 | dz =-0.35 | 0.031063 | 0.302346 |
|  | PO r (Parietal Operculum Cortex Right) - Cereb8 l (Cerebellum VIII Left) | T(40) = -2.09 | dz =-0.33 | 0.043266 | 0.561442 |
| Cluster 6/13 | | F(2,39) = 8.42 | η² = 0.3 | 0.000914 | 0.024238 |
|  | pMTG r (Middle Temporal Gyrus, posterior division Right) - toITG r (Inferior Temporal Gyrus, temporooccipital part Right) | T(40) = 3.78 | dz = 0.59 | 0.000511 | 0.051922 |
|  | pMTG r (Middle Temporal Gyrus, posterior division Right) - toITG l (Inferior Temporal Gyrus, temporooccipital part Left) | T(40) = 3.55 | dz = 0.55 | 0.001007 | 0.051922 |
|  | pMTG r (Middle Temporal Gyrus, posterior division Right) - toMTG r (Middle Temporal Gyrus, temporooccipital part Right) | T(40) = 3.24 | dz = 0.51 | 0.002435 | 0.059257 |
|  | pMTG r (Middle Temporal Gyrus, posterior division Right) - toMTG l (Middle Temporal Gyrus, temporooccipital part Left) | T(40) = 2.48 | dz = 0.39 | 0.017587 | 0.142648 |
|  | pSTG r (Superior Temporal Gyrus, posterior division Right) - toMTG l (Middle Temporal Gyrus, temporooccipital part Left) | T(40) = 3.15 | dz = 0.49 | 0.003119 | 0.319275 |
|  | pSTG r (Superior Temporal Gyrus, posterior division Right) - toMTG r (Middle Temporal Gyrus, temporooccipital part Right) | T(40) = 2.57 | dz = 0.4 | 0.014162 | 0.319275 |
|  | pSTG r (Superior Temporal Gyrus, posterior division Right) - toITG r (Inferior Temporal Gyrus, temporooccipital part Right) | T(40) = 2.17 | dz = 0.34 | 0.036400 | 0.353822 |
| Cluster 7/13 | | F(2,39) = 8.30 | η² = 0.3 | 0.000992 | 0.024238 |
|  | FP l (Frontal Pole Left) - Ver8 (Vermis VII) | T(40) = -4.40 | dz =-0.69 | 0.000079 | 0.009696 |
|  | FP l (Frontal Pole Left) - Cereb2 r (Cerebellum Crus2 Right) | T(40) = -4.23 | dz =-0.66 | 0.000133 | 0.009696 |
|  | PaCiG r (Paracingulate Gyrus Right) - Cereb2 l (Cerebelum Crus2 Left) | T(40) = -3.74 | dz =-0.58 | 0.000570 | 0.041580 |
|  | FP l (Frontal Pole Left) - Cereb1 r (Cerebelum Crus1 Right) | T(40) = -3.54 | dz =-0.55 | 0.001019 | 0.049583 |
|  | PaCiG r (Paracingulate Gyrus Right)-atlas.Cereb1 r (Cerebellum Crus1 Right) | T(40) = -3.00 | dz =-0.47 | 0.004627 | 0.079729 |
|  | PaCiG r (Paracingulate Gyrus Right) - Cereb1 l (Cerebellum Crus1 Left) | T(40) = -2.90 | dz =-0.45 | 0.006007 | 0.079729 |
|  | PaCiG r (Paracingulate Gyrus Right) - Cereb2 r (Cerebellum Crus2 Right) | T(40) = -2.80 | dz =-0.44 | 0.007822 | 0.095170 |
|  | PaCiG r (Paracingulate Gyrus Right) - Ver8 (Vermis VIII) | T(40) = -2.55 | dz = -0.4 | 0.014678 | 0.114978 |
|  | PaCiG l (Paracingulate Gyrus Left) - Cereb1 r (Cerebellum Crus1 Right) | T(40) = -2.72 | dz =-0.42 | 0.009558 | 0.126859 |
|  | PaCiG l (Paracingulate Gyrus Left) - Ver8 (Vermis VIII) | T(40) = -2.65 | dz =-0.41 | 0.011438 | 0.137212 |
|  | PaCiG l (Paracingulate Gyrus Left) - Cereb2 l (Cerebelum Crus2 Left) | T(40) = -2.59 | dz = -0.4 | 0.013193 | 0.137212 |
|  | PaCiG l (Paracingulate Gyrus Left) - Cereb2 r (Cerebellum Crus2 Right) | T(40) = -2.57 | dz = -0.4 | 0.014097 | 0.137212 |
|  | PaCiG l (Paracingulate Gyrus Left) - Cereb1 l (Cerebellum Crus1 Left) | T(40) = -2.49 | dz =-0.39 | 0.016986 | 0.154995 |
|  | PaCiG r (Paracingulate Gyrus Right) - Cereb7 r (Cerebellum 7b Right) | T(40) = -2.11 | dz =-0.33 | 0.041516 | 0.201026 |
|  | FP r (Frontal Pole Right) - Cereb2 r (Cerebellum Crus2 Right) | T(40) = -2.63 | dz =-0.41 | 0.012038 | 0.390323 |
|  | FP r (Frontal Pole Right) - Cereb2 l (Cerebelum Crus2 Left) | T(40) = -2.57 | dz = -0.4 | 0.013873 | 0.390323 |
|  | FP r (Frontal Pole Right) - Ver8 (Vermis VIII) | T(40) = -2.34 | dz =-0.37 | 0.024449 | 0.390323 |
|  | FP r (Frontal Pole Right) - Cereb8 l (Cerebelum VIII Left) | T(40) = -2.28 | dz =-0.36 | 0.027931 | 0.390323 |
|  | FP l (Frontal Pole Left) - Cereb1 l (Cerebelum Crus1 Left) | T(40) = -2.07 | dz =-0.32 | 0.045243 | 0.430570 |
| Cluster 8/13 | | F(2,39) = 7.85 | 0.001366 | η² = 0.29 | 0.026328 |
|  | Ver9 (Vermis 9) - Cereb6 r (Cerebellum VI Right) | T(40) = 4.80 | dz = 0.75 | 0.000022 | 0.003222 |
|  | Cereb1 r (Cerebellum Crus1 Right) - Cereb6 r (Cerebellum VI Right) | T(40) = 4.08 | dz = 0.64 | 0.000208 | 0.019253 |
|  | Cereb1 r (Cerebellum Crus1 Right) - Cereb6 l (Cerebellum VI Left) | T(40) = 4.00 | dz = 0.62 | 0.000264 | 0.019253 |
|  | Cereb1 l (Cerebellum Crus1 Left) - Cereb6 l (Cerebellum VI Left) | T(40) = 3.65 | dz = 0.57 | 0.000761 | 0.031857 |
|  | Cereb1 l (Cerebellum Crus1 Left) - Cereb6 r (Cerebellum VI Right) | T(40) = 3.39 | dz = 0.53 | 0.001567 | 0.045749 |
|  | Cereb2 l (Cerebellum Crus2 Left) - Cereb6 l (Cerebellum VI Left) | T(40) = 2.88 | dz = 0.45 | 0.006368 | 0.088888 |
|  | Cereb1 r (Cerebellum Crus1 Right) - Ver6 (Vermis VI) | T(40) = 3.06 | dz = 0.48 | 0.003917 | 0.096511 |
|  | Ver8 (Vermis VIII) - TOFusC l (Temporal Occipital Fusiform Cortex Left) | T(40) = 2.94 | dz = 0.46 | 0.005398 | 0.105360 |
|  | Ver8 (Vermis VIII) - Cereb6 r (Cerebellum VI Right) | T(40) = 2.85 | dz = 0.45 | 0.006869 | 0.105360 |
|  | Ver8 (Vermis VIII) - Cereb6 l (Cerebelum VI Left) | T(40) = 2.58 | dz = 0.4 | 0.013540 | 0.105360 |
|  | Cereb2 l (Cerebellum Crus2 Left) - Ver7 (Vermis VII) | T(40) = 2.71 | dz = 0.42 | 0.009795 | 0.110010 |
|  | Cereb1 l (Cerebellum Crus1 Left) - Ver7 (Vermis VII) | T(40) = 2.44 | dz = 0.38 | 0.019119 | 0.141034 |
|  | Cereb1 r (Cerebellum Crus1 Right) - Ver7 (Vermis VII) | T(40) = 2.38 | dz = 0.37 | 0.022001 | 0.144287 |
|  | Cereb2 l (Cerebellum Crus2 Left) - Cereb6 r (Cerebellum VI Right) | T(40) = 2.33 | dz = 0.36 | 0.024985 | 0.173705 |
|  | Cereb1 l (Cerebellum Crus1 Left) - Ver6 (Vermis VI) | T(40) = 2.13 | dz = 0.33 | 0.038962 | 0.192415 |
|  | Cereb2 r (Cerebellum Crus2 Right) - Cereb6 l (Cerebellum VI Left) | T(40) = 2.36 | dz = 0.33 | 0.023201 | 0.211705 |
|  | Ver9 (Vermis IX) - TOFusC l (Temporal Occipital Fusiform Cortex Left) | T(40) = 2.40 | dz = 0.37 | 0.021114 | 0.225014 |
|  | Ver8 (Vermis VIII) - Ver7 (Vermis VII) | T(40) = 2.06 | dz = 0.37 | 0.046261 | 0.241217 |
|  | Cereb8 r (Cerebellum VIII Right) - Ver7 (Vermis VII) | T(40) = 2.23 | dz = 0.32 | 0.031497 | 0.280165 |
|  | Cereb7 l (Cerebellum VIIb Left) - Cereb6 l (Cerebellum VI Left) | T(40) = 2.27 | dz = 0.35 | 0.028894 | 0.280391 |
|  | Ver9 (Vermis IX) - Ver7 (Vermis VII) | T(40) = 2.21 | dz = 0.35 | 0.032553 | 0.290238 |
|  | Ver9 (Vermis IX) - Cereb6 l (Cerebellum VI Left) | T(40) = 2.20 | dz = 0.35 | 0.033795 | 0.290238 |
|  | Cereb7 l (Cerebellum VIIb Left) - TOFusC r (Temporal Occipital Fusiform Cortex Right) | T(40) = 2.13 | dz = 0.34 | 0.039684 | 0.301836 |
| Cluster 9/13 | | F(2,39) = 7.72 | η² = 0.28 | 0.001496 | 0.026328 |
|  | Caudate l - ICC r (Intracalcarine Cortex Right) | T(40) = -4.73 | dz =-0.74 | 0.000028 | 0.004023 |
|  | Caudate r - LG l (Lingual Gyrus Left) | T(40) = -3.93 | dz =-0.61 | 0.000330 | 0.026716 |
|  | Hippocampus l - LG l (Lingual Gyrus Left) | T(40) = 3.40 | dz = 0.53 | 0.001554 | 0.035487 |
|  | Caudate r - OP r (Occipital Pole Right) | T(40) = -3.36 | dz =-0.52 | 0.001716 | 0.056746 |
|  | Caudate r - Cuneal l (Cuneal Cortex Left) | T(40) = -3.33 | dz =-0.52 | 0.001858 | 0.056746 |
|  | Caudate r - ICC l (Intracalcarine Cortex Left) | T(40) = -3.22 | dz = -0.5 | 0.002566 | 0.056746 |
|  | Caudate r - Cuneal r (Cuneal Cortex Right) | T(40) = -3.20 | dz = -0.5 | 0.002721 | 0.056746 |
|  | Caudate ; - ICC l (Intracalcarine Cortex Left) | T(40) = -3.40 | dz =-0.53 | 0.001541 | 0.074981 |
|  | Caudate r - OFusG l (Occipital Fusiform Gyrus Left) | T(40) = -2.99 | dz =-0.47 | 0.004810 | 0.087779 |
|  | Caudate l - LG r (Lingual Gyrus Right) | T(40) = -2.99 | dz =-0.47 | 0.004781 | 0.110236 |
|  | Caudate l- OP l (Occipital Pole Left) | T(40) = -2.68 | dz =-0.42 | 0.010737 | 0.124489 |
|  | Caudate l - OFusG r (Occipital Fusiform Gyrus Right) | T(40) = -2.63 | dz =-0.41 | 0.011937 | 0.124489 |
|  | Caudate r - OP l (Occipital Pole Left) | T(40) = -2.70 | dz =-0.42 | 0.010010 | 0.145815 |
|  | Caudate r - ICC r (Intracalcarine Cortex Right) | T(40) = -2.70 | dz =-0.42 | 0.010030 | 0.145815 |
|  | Caudate r - LG r (Lingual Gyrus Right) | T(40) = -2.55 | dz = -0.4 | 0.014545 | 0.145815 |
|  | Hippocampus l - SCC r (Supracalcarine Cortex Right) | T(40) = 2.39 | dz = 0.37 | 0.021764 | 0.147966 |
|  | Hippocampus l - OFusG l (Occipital Fusiform Gyrus Left) | T(40) = 2.38 | dz = 0.37 | 0.022296 | 0.147966 |
|  | Caudate l - OP r (Occipital Pole Right) | T(40) = -2.43 | dz =-0.38 | 0.019745 | 0.169571 |
|  | Hippocampus r - LG l (Lingual Gyrus Left) | T(40) = 2.60 | dz = 0.41 | 0.013143 | 0.174446 |
|  | Caudate l - LG l (Lingual Gyrus Left) | T(40) = -2.33 | dz =-0.36 | 0.024675 | 0.189610 |
|  | AAN_LC_R (Locus Coeruleus Right) - OFusG l (Occipital Fusiform Gyrus Left) | T(40) = -3.27 | dz =-0.51 | 0.002232 | 0.209365 |
|  | Hippocampus l - Cuneal r (Cuneal Cortex Right) | T(40) = 2.05 | dz = 0.32 | 0.047180 | 0.222201 |
|  | Thalamus r - Cuneal l (Cuneal Cortex Left) | T(40) = -2.38 | dz =-0.37 | 0.022395 | 0.272467 |
|  | Hippocampus r - iLOC l (Lateral Occipital Cortex, inferior division Left) | T(40) = 2.23 | dz = 0.35 | 0.031247 | 0.285126 |
|  | Hippocampus r - OP r (Occipital Pole Right) | T(40) = 2.17 | dz = 0.34 | 0.035636 | 0.286514 |
|  | Hippocampus r - ICC l (Intracalcarine Cortex Left) | T(40) = 2.12 | dz = 0.33 | 0.040305 | 0.286514 |
|  | Putamen l - Cuneal l (Cuneal Cortex Left) | T(40) = -3.04 | dz =-0.47 | 0.004129 | 0.301398 |
|  | AAN_PAG (Periaqueductal Gray) - LG l (Lingual Gyrus Left) | T(40) = 2.17 | dz = 0.34 | 0.036372 | 0.312367 |
|  | pTFusC r (Temporal Fusiform Cortex, posterior division Right) - OP r (Occipital Pole Right) | T(40) = 2.03 | dz = 0.32 | 0.049229 | 0.329928 |
|  | Thalamus r - OP l (Occipital Pole Left) | T(40) = -2.21 | dz =-0.35 | 0.032718 | 0.346491 |
|  | Thalamus r - .OFusG l (Occipital Fusiform Gyrus Left) | T(40) = -2.19 | dz =-0.34 | 0.034642 | 0.346491 |
|  | AAN_mesRF_L (mesencephalic reticular formation Left) - iLOC r (Lateral Occipital Cortex, inferior division Right) | T(40) = 2.30 | dz = 0.36 | 0.026603 | 0.398242 |
|  | AAN_mesRF_L (mesencephalic reticular formation Left) - SCC l (Supracalcarine Cortex Left) | T(40) = 2.10 | dz = 0.33 | 0.042430 | 0.398242 |
|  | AAN_MedRaphe - SCC r (Supracalcarine Cortex Right) | T(40) = -2.30 | dz =-0.36 | 0.026715 | 0.433370 |
|  | Putamen r - Cuneal l (Cuneal Cortex Left) | T(40) = -2.08 | dz =-0.32 | 0.044022 | 0.484965 |
|  | AAN_PPN_R (pedunculopontine nucleus Right) - OP r (Occipital Pole Right) | T(40) = 2.50 | dz = 0.39 | 0.016654 | 0.486310 |
|  | Thalamus l - OP l (Occipital Pole Left) | T(40) = -2.11 | dz =-0.33 | 0.041618 | 0.506356 |
|  | Accumbens r - Cuneal l (Cuneal Cortex Left) | T(40) = -2.70 | dz =-0.42 | 0.010225 | 0.533527 |
|  | Accumbens r - OP l (Occipital Pole Left) | T(40) = -2.44 | dz =-0.38 | 0.019052 | 0.533527 |
|  | Accumbens r - OFusG l (Occipital Fusiform Gyrus Left) | T(40) = -2.17 | dz =-0.34 | 0.036246 | 0.533527 |
|  | Accumbens r - OP r (Occipital Pole Right) | T(40) = -2.03 | dz =-0.32 | 0.049209 | 0.533527 |
|  | AAN_PPN_R (pedunculopontine nucleus Right) - ICC l (Intracalcarine Cortex Left) | T(40) = 2.13 | dz = 0.33 | 0.039284 | 0.544662 |
|  | AAN_mesRF_R (mesencephalic reticular formation Right) - SCC r (Supracalcarine Cortex Right) | T(40) = 2.25 | dz = 0.35 | 0.030078 | 0.609765 |
|  | AAN_mesRF_R (mesencephalic reticular formation Right) - ICC r (Intracalcarine Cortex Right) | T(40) = 2.08 | dz = 0.32 | 0.043919 | 0.609765 |
|  | AAN_mesRF_R (mesencephalic reticular formation Right) - Cuneal r (Cuneal Cortex Right) | T(40) = 2.02 | dz = 0.32 | 0.049655 | 0.609765 |
|  | Putamen l - ICC l (Intracalcarine Cortex Left) | T(40) = -2.59 | dz = -0.4 | 0.013326 | 0.636805 |
|  | Putamen l - Cuneal r (Cuneal Cortex Right) | T(40) = -2.31 | dz =-0.36 | 0.026170 | 0.636805 |
|  | AAN_PontRF_R (pontine reticular formation Right) - SCC r (Supracalcarine Cortex Right) | T(40) = -2.70 | dz =-0.42 | 0.010159 | 0.690058 |
|  | AAN_DorsalRaphe - ICC r (Intracalcarine Cortex Right) | T(40) = 2.10 | dz = 0.33 | 0.041789 | 0.702659 |
|  | AAN_PPN_L (pedunculopontine nucleus Left) - OP r (Occipital Pole Right) | T(40) = 2.60 | dz = 0.41 | 0.012900 | 0.709979 |
|  | AAN_VTA (ventral tegmental area) - SCC l (Supracalcarine Cortex Left) | T(40) = 2.06 | dz = 0.32 | 0.046348 | 0.732095 |
|  | Accumbens l - Cuneal l (Cuneal Cortex Left) | T(40) = -2.20 | dz =-0.34 | 0.033509 | 0.753982 |
|  | AAN_LC_R (locus coeruleus Right) - iLOC r (Lateral Occipital Cortex, inferior division Right) | T(40) = -2.17 | dz =-0.34 | 0.035962 | 0.836174 |
|  | AAN_LC_R (locus coeruleus Right) - iLOC l (Lateral Occipital Cortex, inferior division Left) | T(40) = -2.13 | dz =-0.33 | 0.039756 | 0.836174 |
|  | AAN_PPN_L (pedunculopontine nucleus Left) - OP l (Occipital Pole Left) | T(40) = 2.08 | dz = 0.32 | 0.044313 | 0.924239 |
| Cluster 10/13 | | F(2,39) = 7.68 | η² = 0.28 | 0.001540 | 0.026328 |
|  | Ver6 (Vermis VI) - TOFusC l (Temporal Occipital Fusiform Cortex Left) | T(40) = 3.56 | dz = 0.56 | 0.000983 | 0.047816 |
|  | Ver7 (Vermis VII) - Ver6 (Vermis VI) | T(40) = 3.43 | dz = 0.54 | 0.001423 | 0.058701 |
|  | Ver7 (Vermis VII) - Cereb6 l (Cerebelum VI Left) | T(40) = 3.12 | dz = 0.49 | 0.003391 | 0.058701 |
|  | Ver6 (Vermis VI) - TOFusC r (Temporal Occipital Fusiform Cortex Right) | T(40) = 3.10 | dz = 0.48 | 0.003518 | 0.095308 |
|  | Cereb6 r (Cerebellum VI Right)- TOFusC l (Temporal Occipital Fusiform Cortex Left) | T(40) = 2.63 | dz = 0.41 | 0.011981 | 0.141094 |
|  | Ver7 (Vermis VII) - TOFusC l (Temporal Occipital Fusiform Cortex Left) | T(40) = 2.14 | dz = 0.33 | 0.038881 | 0.183117 |
|  | Ver6 (Vermis VI) - Cereb6 r (Cerebellum 6 Right) | T(40) = 2.61 | dz = 0.41 | 0.012563 | 0.203802 |
|  | Ver6 (Vermis VI) - Cereb6 l (Cerebellum 6 Left) | T(40) = 2.10 | dz = 0.33 | 0.041693 | 0.320375 |
| Cluster 11/13 | | F(2,39) = 7.24 | η² = 0.27 | 0.002119 | 0.032941 |
|  | Cereb45 r (Cerebellum IV, V Right)- toMTG r (Middle Temporal Gyrus, temporooccipital part Right) | T(40) = 4.51 | dz = 0.7 | 0.000056 | 0.008174 |
|  | Cereb45 l (Cerebelum IV, V Left)- toMTG l (Middle Temporal Gyrus, temporooccipital part Left) | T(40) = 3.33 | dz = 0.52 | 0.001878 | 0.116844 |
|  | Cereb45 r (Cerebelum IV, V Right) - toMTG l (Middle Temporal Gyrus, temporooccipital part Left) | T(40) = 2.85 | dz = 0.45 | 0.006923 | 0.134064 |
|  | Ver45 (Vermis IV, V) - toMTG l (Middle Temporal Gyrus, temporooccipital part Left) | T(40) = 2.96 | dz = 0.46 | 0.005157 | 0.147631 |
|  | Cereb45 l (Cerebellum IV, V Left) - toITG r (Inferior Temporal Gyrus, temporooccipital part Right) | T(40) = 2.66 | dz = 0.42 | 0.011315 | 0.160681 |
|  | Cereb45 l (Cerebellum IV, V Left) - toMTG r (Middle Temporal Gyrus, temporooccipital part Right) | T(40) = 2.43 | dz = 0.38 | 0.019790 | 0.169963 |
|  | Cereb45 l (Cerebellum IV, V Left) - toITG l (Inferior Temporal Gyrus, temporooccipital part Left) | T(40) = 2.33 | dz = 0.36 | 0.024787 | 0.175981 |
|  | Cereb45 r (Cerebellum IV, V Right) - toITG r (Inferior Temporal Gyrus, temporooccipital part Right) | T(40) = 2.20 | dz = 0.34 | 0.033294 | 0.186957 |
|  | Ver45 (Vermis IV, V) - toITG r (Inferior Temporal Gyrus, temporooccipital part Right) | T(40) = 2.33 | dz = 0.36 | 0.024815 | 0.230809 |
|  | Ver45 (Vermis IV, V) - toMTG r (Middle Temporal Gyrus, temporooccipital part Right) | T(40) = 2.12 | dz = 0.33 | 0.040112 | 0.272414 |
|  | Cereb3 r (Cerebellum III Right) - toMTG r (Middle Temporal Gyrus, temporooccipital part Right) | T(40) = 2.12 | dz = 0.33 | 0.040306 | 0.403811 |
|  | Cereb3 l (Cerebellum III Left) - toITG r (Inferior Temporal Gyrus, temporooccipital part Right) | T(40) = 2.33 | dz = 0.36 | 0.024984 | 0.455956 |
| Cluster 12/13 | | F(2,39) = 6.76 | η² = 0.26 | 0.003024 | 0.042972 |
|  | Cereb45 r (Cerebellum IV, V Right) - Ver9 (Vermis IX) | T(40) = 3.08 | dz = 0.48 | 0.003697 | 0.107965 |
|  | Cereb45 l (Cerebellum IV, V Left) - Cereb7 l (Cerebellum VIIb Left) | T(40) = 3.10 | dz = 0.48 | 0.003540 | 0.116844 |
|  | Cereb45 r (Cerebellum IV, V Right) - Ver8 (Vermis VIII) | T(40) = 2.82 | dz = 0.44 | 0.007346 | 0.134064 |
|  | Ver45 (Vermis IV, V) - Cereb7 r (Cerebellum VIIb Right) | T(40) = 2.90 | dz = 0.45 | 0.006067 | 0.147631 |
|  | Cereb45 l (Cerebellum IV, V Left) - Ver8 (Vermis VIII) | T(40) = 2.69 | dz = 0.42 | 0.010392 | 0.160681 |
|  | Cereb45 l (Cerebellum IV, V Left) - Cereb2 l (Cerebellum Crus2 Left) | T(40) = 2.30 | dz = 0.36 | 0.026737 | 0.177434 |
|  | Cereb45 r (Cerebellum IV, V Right) - Cereb8 l (Cerebellum VIII Left) | T(40) = 2.34 | dz = 0.37 | 0.024580 | 0.177911 |
|  | Ver45 (Vermis IV, V) - Ver8 (Vermis VIII) | T(40) = 2.58 | dz = 0.4 | 0.013711 | 0.179939 |
|  | Cereb45 r (Cerebellum IV, V Right) - Cereb2 r (Cerebellum Crus2 Right) | T(40) = 2.21 | dz = 0.35 | 0.032989 | 0.186957 |
|  | Cereb45 r (Cerebellum IV, V Right) - Cereb1 l (Cerebellum Crus1 Left) | T(40) = 2.10 | dz = 0.33 | 0.041650 | 0.225218 |
|  | Cereb45 r (Cerebellum IV, V Right) - Cereb8 r (Cerebellum VIII Right) | T(40) = 2.03 | dz = 0.32 | 0.048772 | 0.237356 |
|  | Cereb45 l (Cerebellum IV V Left) - Ver9 (Vermis IX) | T(40) = 2.08 | dz = 0.32 | 0.043743 | 0.245636 |
|  | Ver45 (Vermis IV V) - Cereb2 l (Cerebellum Crus2 Left) | T(40) = 2.21 | dz = 0.35 | 0.032882 | 0.252672 |
|  | Cereb3 r (Cerebellum III Right) - Cereb1 r (Cerebellum Crus1 Right) | T(40) = 2.49 | dz = 0.39 | 0.017027 | 0.403811 |
|  | Cereb3 r (Cerebellum III Right)- Cereb8 r (Cerebellum VIII Right) | T(40) = 2.21 | dz = 0.35 | 0.032622 | 0.403811 |
|  | Cereb3 r (Cerebellum III Right) - Cereb7 l (Cerebellum VIIb Left) | T(40) = 2.06 | dz = 0.32 | 0.045567 | 0.403811 |
|  | Ver3 (Vermis III) - Cereb1 r (Cerebellum Crus1 Right) | T(40) = 2.22 | dz = 0.35 | 0.032263 | 0.461350 |
|  | Ver3 (Vermis III) - Cereb7 r (Cerebellum VIIb Right) | T(40) = 2.18 | dz = 0.34 | 0.034939 | 0.461350 |
|  | Cereb3 l (Cerebellum III Left)- Cereb1 l (Cerebellum Crus1 Left) | T(40) = 2.06 | dz = 0.32 | 0.046265 | 0.508129 |
| Cluster 13/13 | | F(2,39) = 6.65 | η² = 0.25 | 0.003267 | 0.042972 |
|  | TOFusC r (Temporal Occipital Fusiform Cortex Right)- sLOC l (Lateral Occipital Cortex, superior division Left) | T(40) = -4.31 | dz =-0.67 | 0.000103 | 0.015015 |
|  | TOFusC r (Temporal Occipital Fusiform Cortex Right)- sLOC r (Lateral Occipital Cortex, superior division Right) | T(40) = -3.33 | dz =-0.52 | 0.001884 | 0.115186 |
|  | TOFusC l (Temporal Occipital Fusiform Cortex Left)- sLOC r (Lateral Occipital Cortex, superior division Right) | T(40) = -2.08 | dz =-0.32 | 0.043934 | 0.320720 |
|  | TOFusC r (Temporal Occipital Fusiform Cortex Right) - Precuneous (Precuneous Cortex) | T(40) = -2.38 | dz =-0.37 | 0.022387 | 0.375401 |
